# Supplementary material
Source: PubMed Central journal article supplement (PMC8859880)
Supplement: NIHMS1775292-supplement-1.pdf [file NIHMS1775292-supplement-1.pdf]

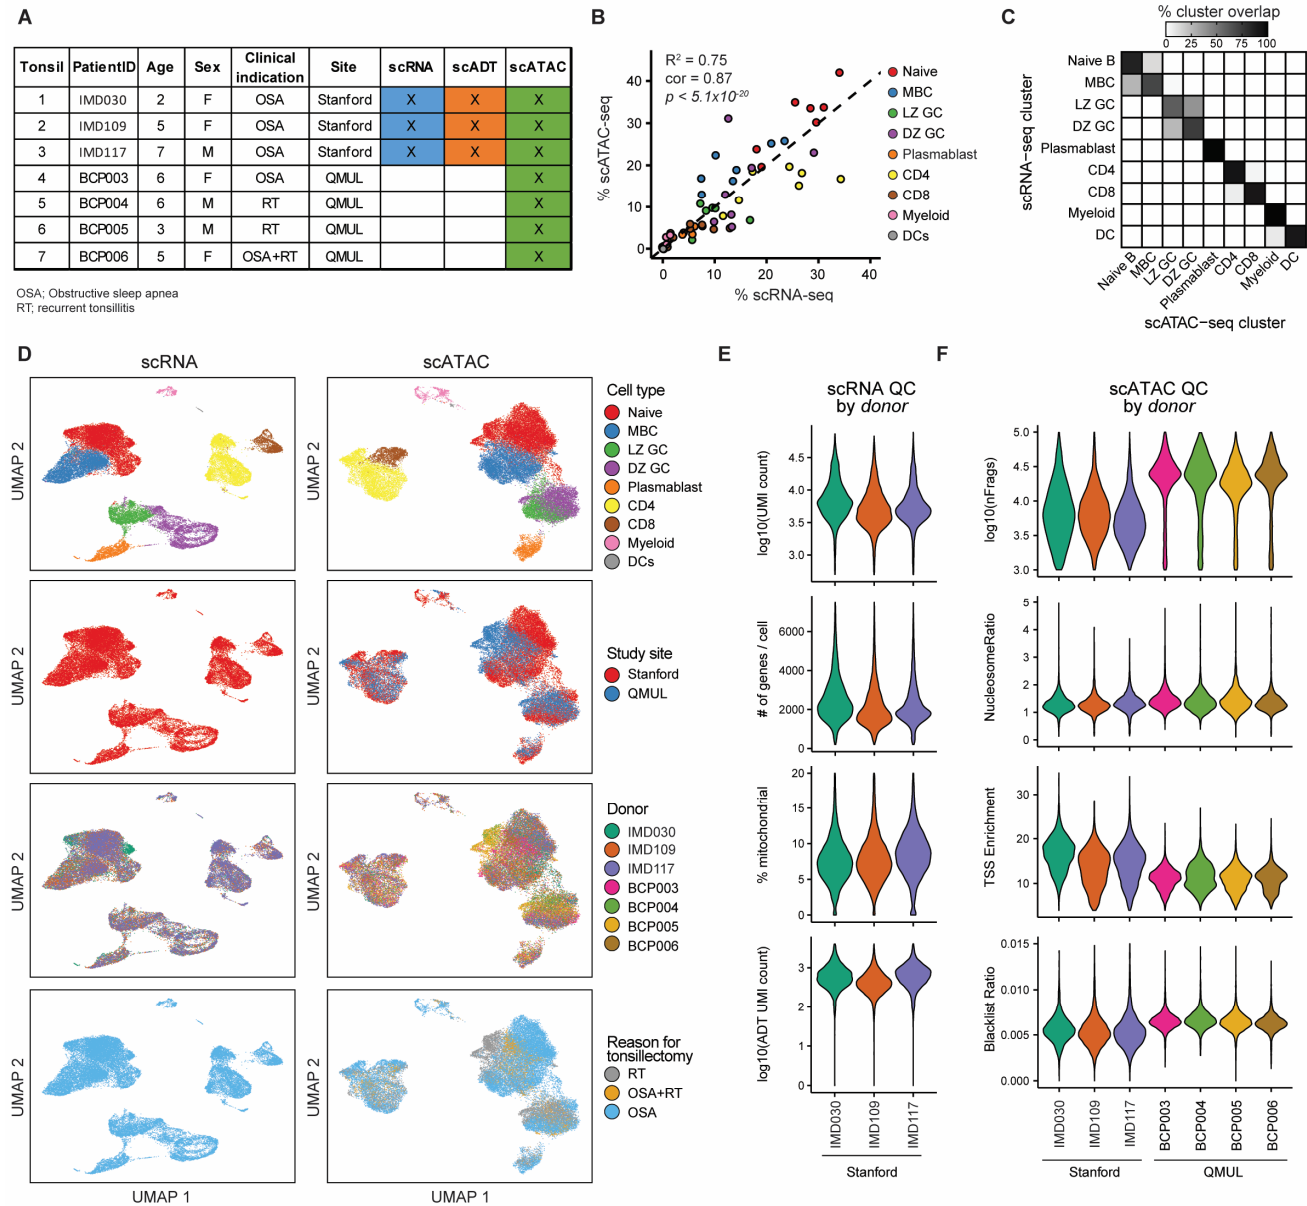

**Figure S1. Single-cell library metadata, integration, batch correction and quality control.**

- A) Metadata of tonsillectomy patients analyzed by single-cell genomics in this study, including age, sex, reason for tonsillectomy (RT; recurrent tonsillitis, OSA; obstructive sleep apnea) and site of study.
- B) Correlation of relative cluster frequencies for scRNA-seq and scATAC-seq within each donor.
- C) Confusion matrix depicting overlap between transferred scRNA-seq cluster identities to scATAC-seq clusters.
- D) UMAP visualization of major cell type clusters, site of study, donor and clinical indication for tonsillectomy for scRNA-seq and scATAC-seq datasets
- E) Quality control metrics for scRNA-seq datasets by donor, including unique molecular identifier (UMI) counts per cell barcode, number of genes detected per cell barcode, percentage mitochondrial gene expression and cell surface ADT UMI counts.
- F) Quality control metrics for scATAC-seq datasets by donor, including number of unique fragments per cell barcode, ratio of nucleosomal to non-nucleosomal fragment sizes, transcription start site enrichment score, and ratio of fragments in genomic blacklist regions (see ArchR for details).

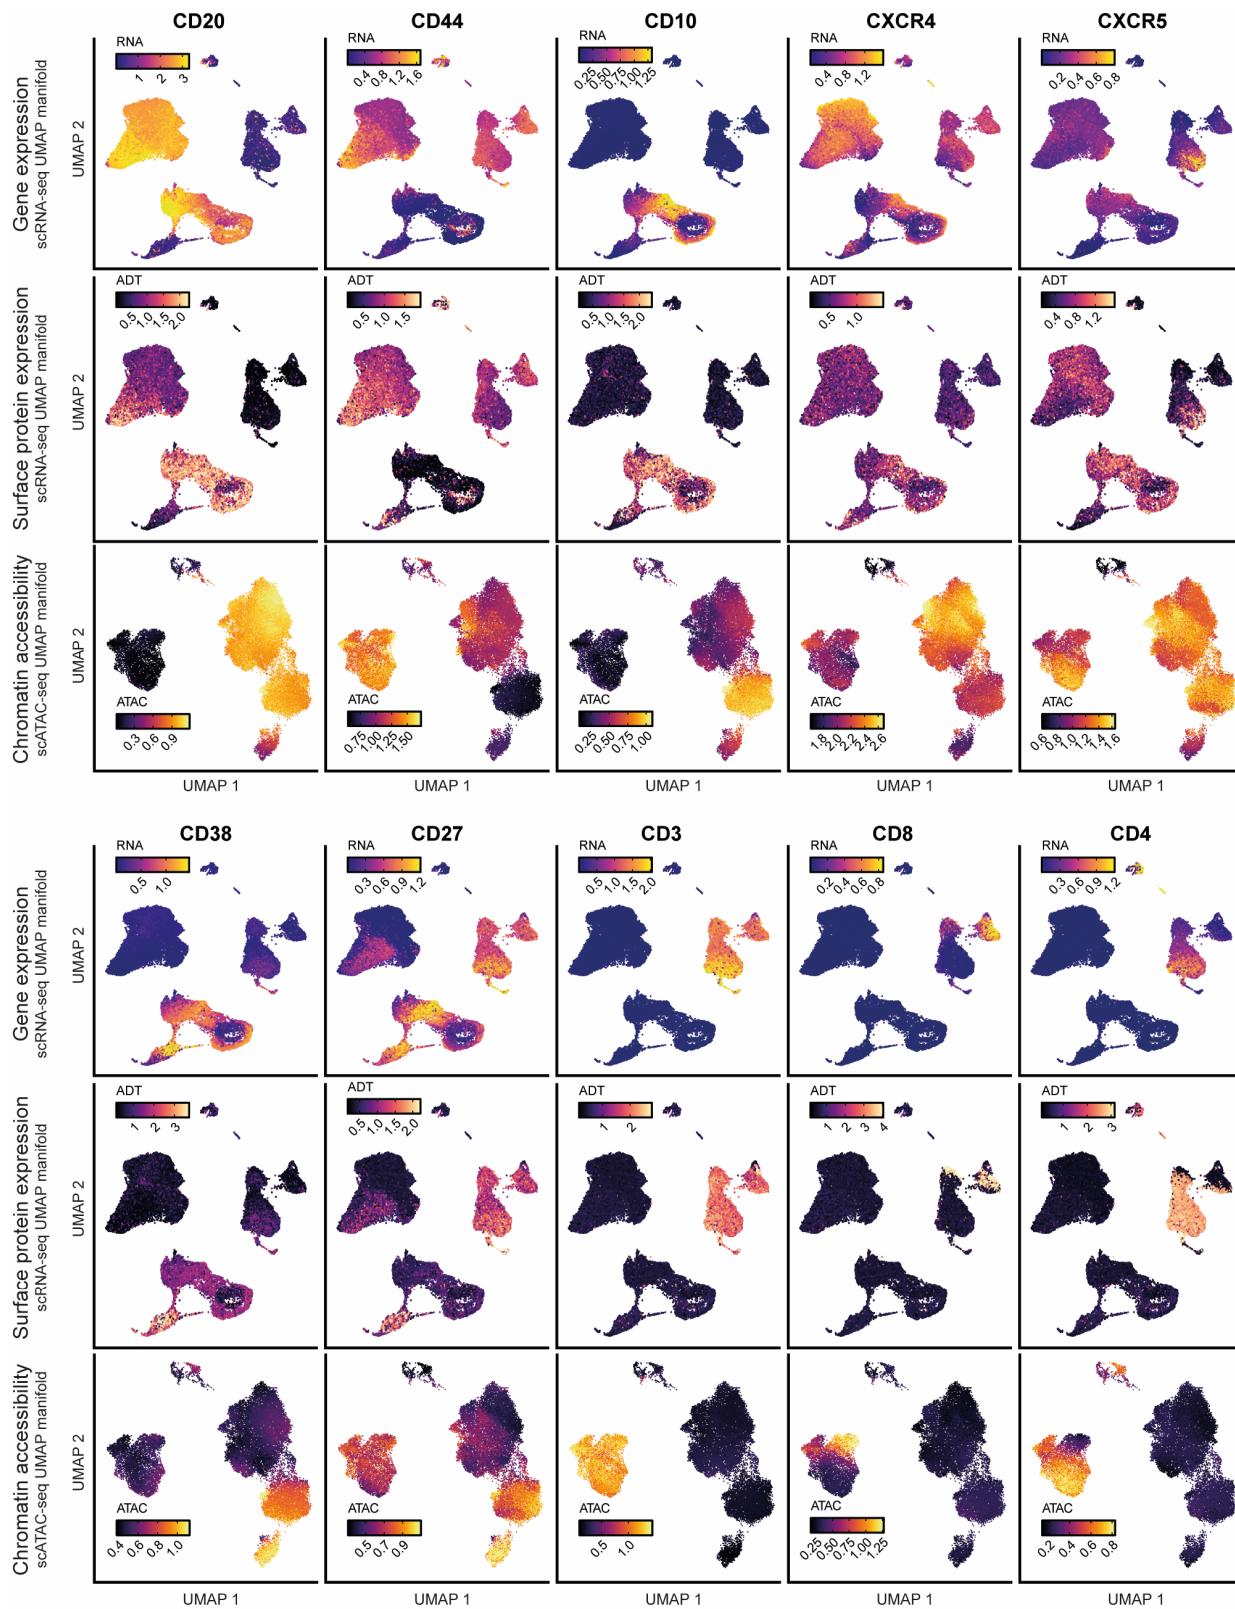

**Figure S2. Comparison of RNA expression, cell surface protein expression and chromatin accessibility of key marker genes.**

scRNA-seq gene expression (top rows), CITE-seq surface protein expression (middle rows) and chromatin accessibility gene scores (bottom rows) for key marker genes. Gene expression and surface protein expression are visualized on the scRNA-seq UMAP manifold and chromatin accessibility scores are visualized on the scATAC-seq UMAP manifold (see Figure 1b).

1157  
1158  
1159  
1160  
1161  
1162

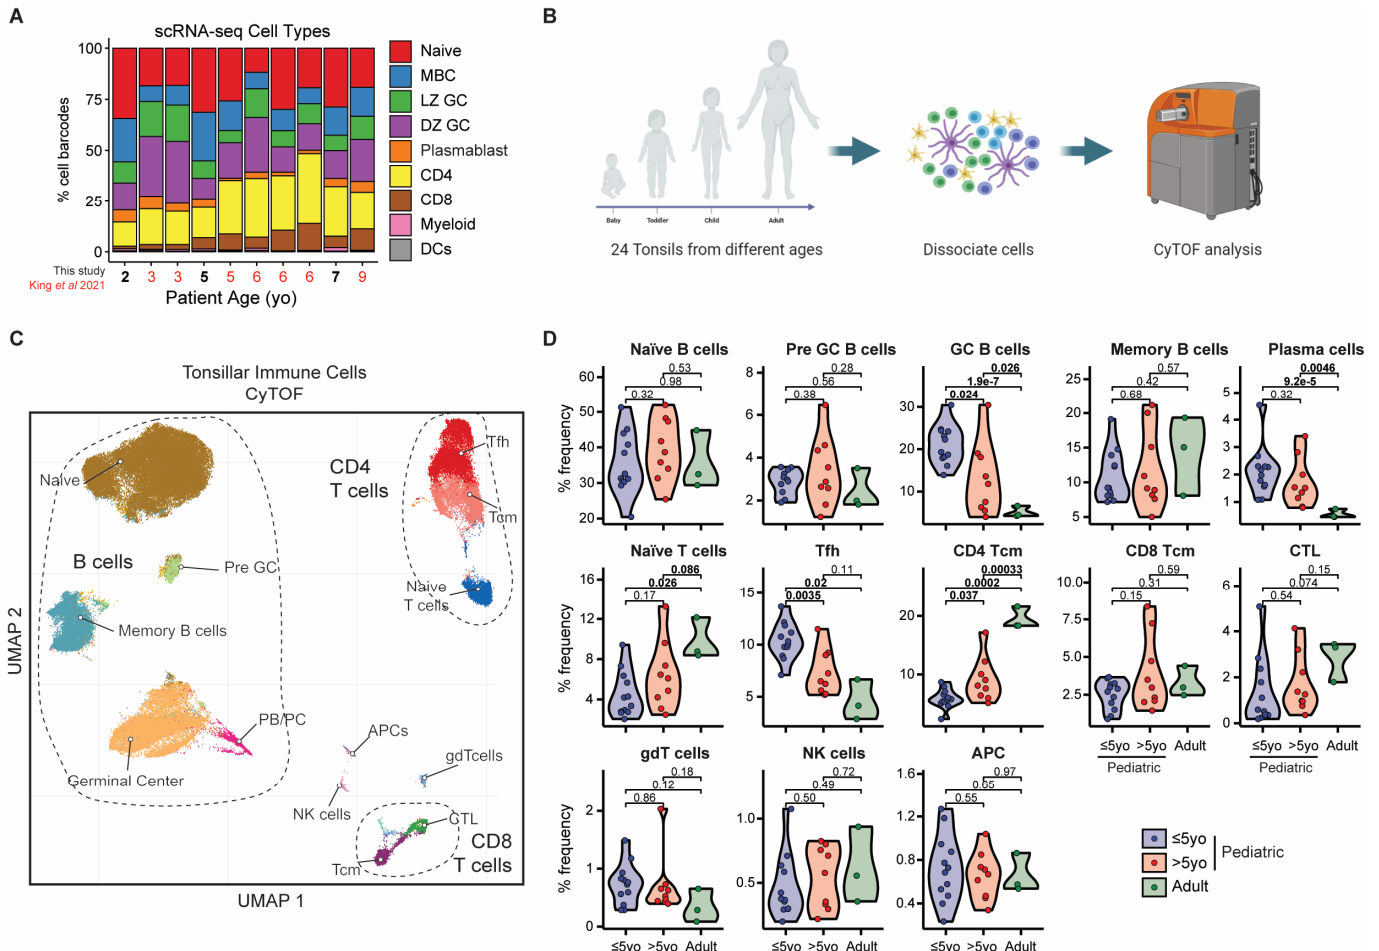

1163  
1164  
1165  
1166  
1167  
1168  
1169  
1170

**Figure S3. Age-related changes in tonsillar immune cell populations by scRNA-seq and CyTOF.**

- A) Relative scRNA-seq cluster frequencies of different donors ordered by patient age. Additional tonsillar immune cell samples from King *et al.* (2021) are included (see red labels).
- B) Schematic of CyTOF analyses for age-related differences in tonsillar immune cell populations.
- C) UMAP visualization of CyTOF analysis of tonsillar immune cells with major immune cell populations ( $n=24$ ).
- D) Quantitation of relative frequencies of immune cell subsets separated by patient age. *p* values denote results from Student's *t* test.

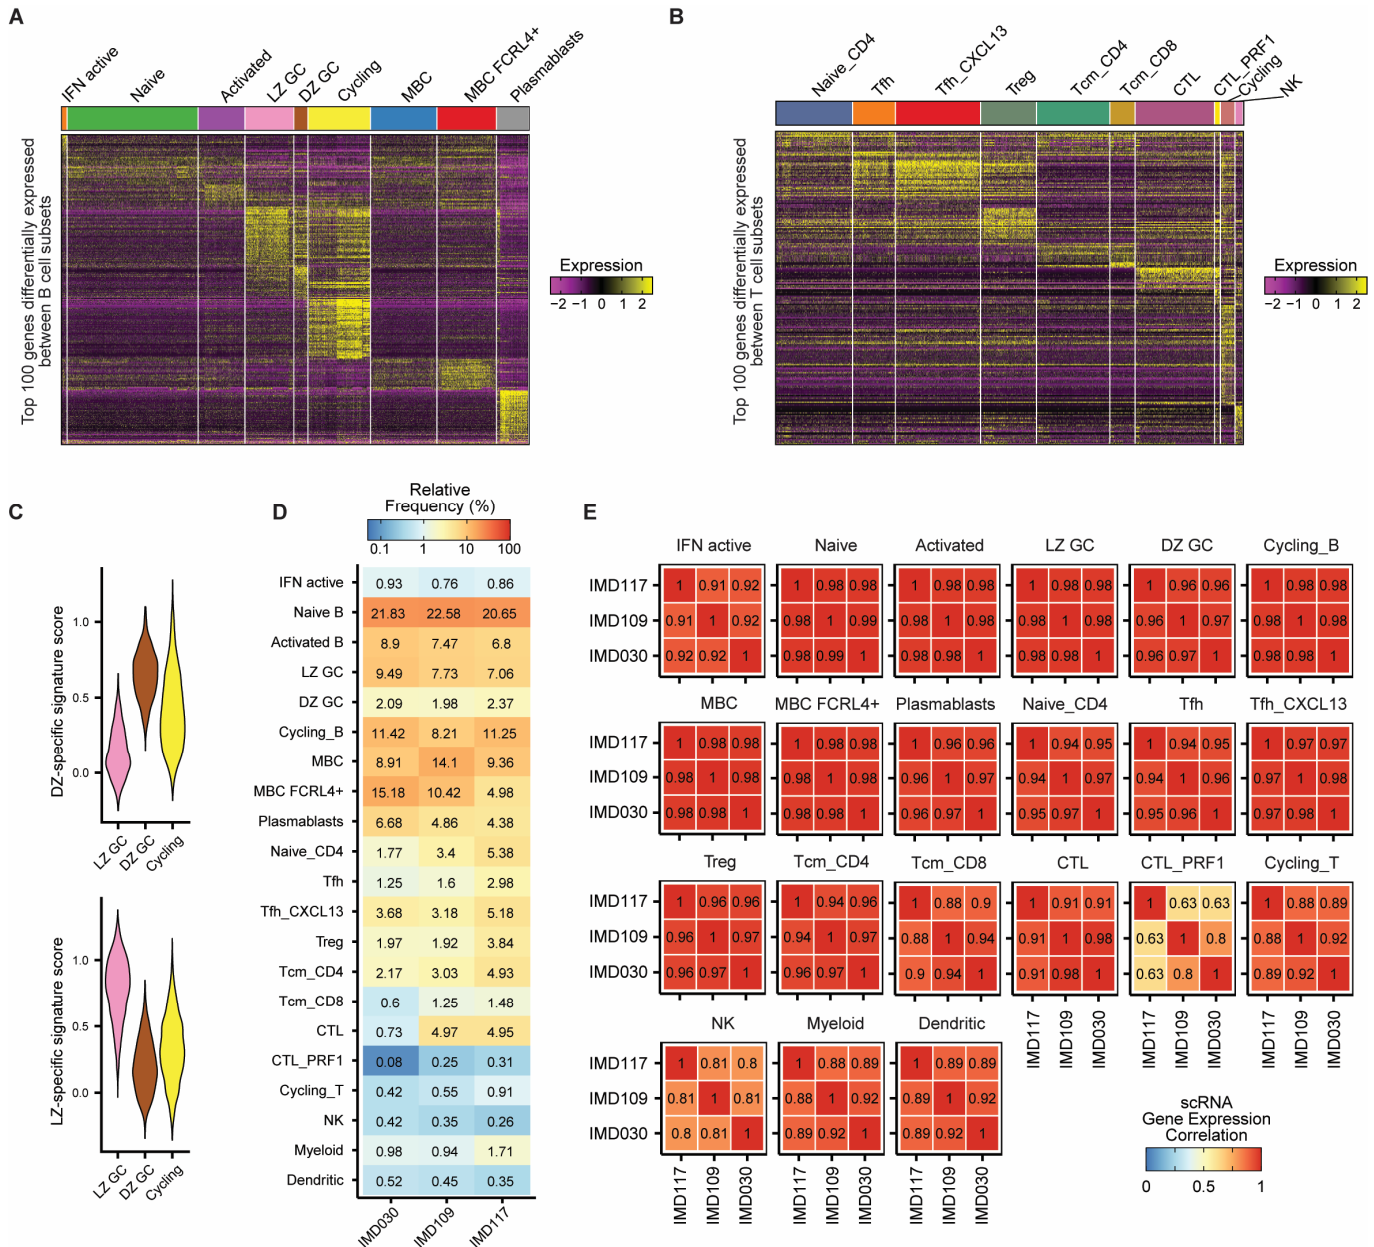

**Figure S4. Tonsil scRNA-seq marker gene heatmaps, annotation of GC B cells and reproducibility of cell types across donors.**

- A) scRNA-seq heatmap of top 100 most differentially expressed genes for high resolution B cell clusters (as in Fig1F-G).  
 B) scRNA-seq heatmap of top 100 most differentially expressed genes for high resolution T cell clusters (as in Fig1D-E).  
 C) Gene signature scores for DZ-specific and LZ-specific marker genes in LZ GC, DZ GC and cycling B cell clusters.  
 D) Relative frequency of high resolution scRNA-seq cell type clusters across the three patient donors.  
 E) Spearman correlation coefficients of mean gene expression per cell type cluster between patient donors.

1171  
 1172  
 1173  
 1174  
 1175  
 1176  
 1177  
 1178



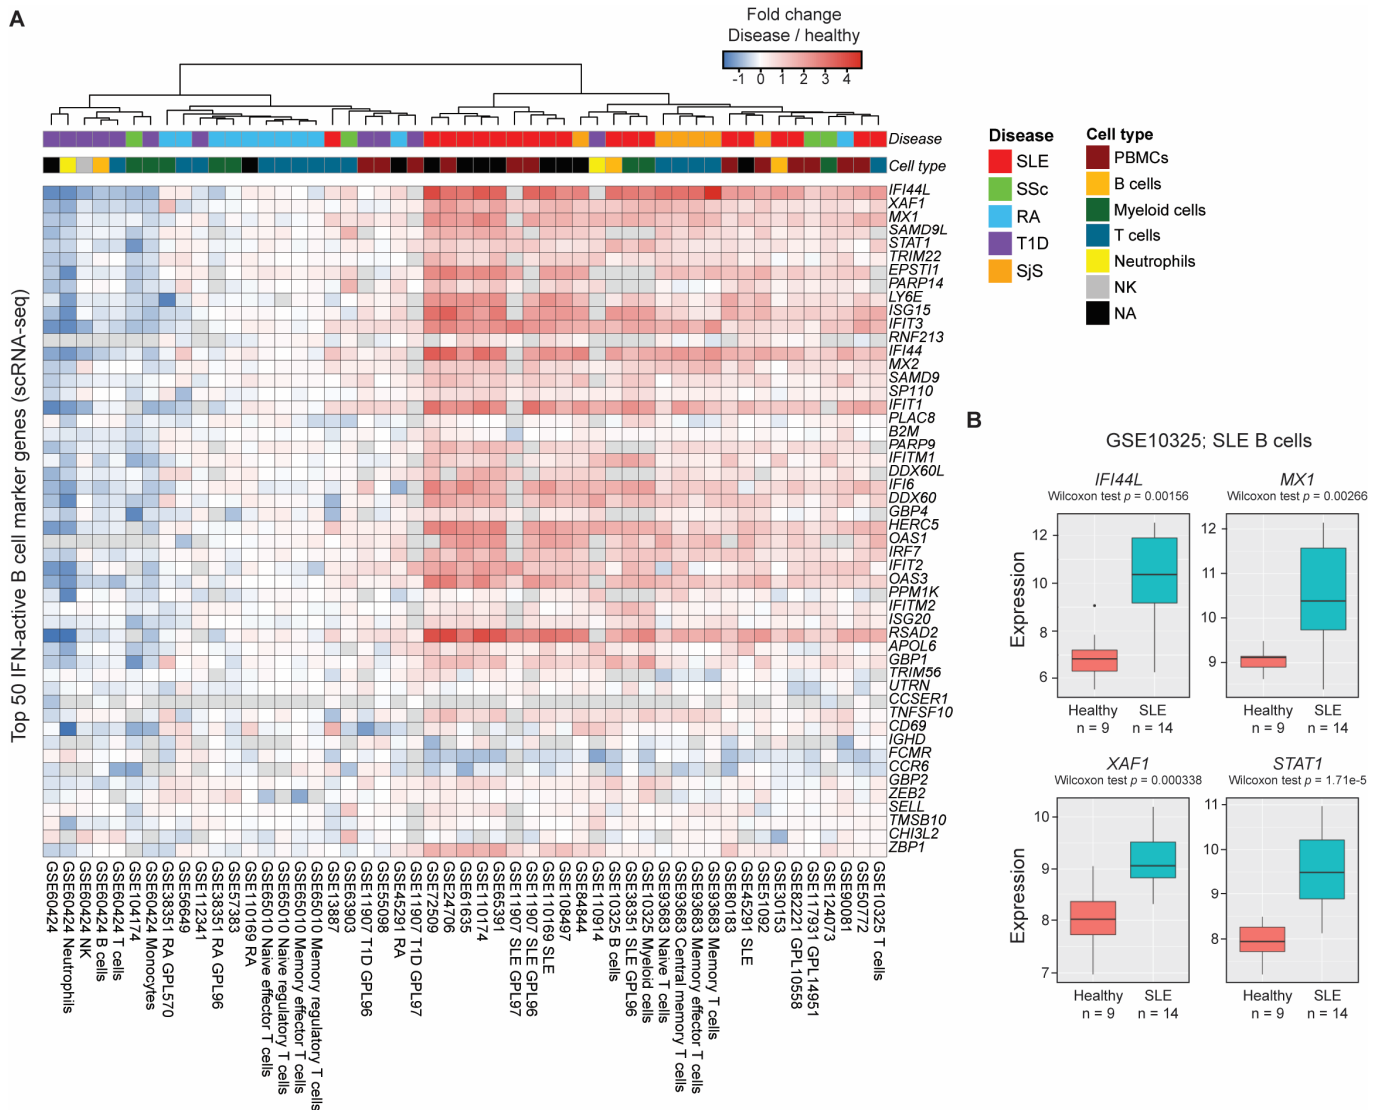

**Figure S5. Differential expression in autoimmune disease of top scRNA-seq marker genes for the IFN\_active B cell cluster.**

- A) Differential expression of top 50 marker genes for IFN-active B cell cluster (as in Fig1F-G) between control and autoimmune patient gene expression studies, generated from ADEX: Autoimmune Diseases Explorer (<https://adex.genyo.es/>; (11)). SLE; systemic lupus erythematosus. SSc; systemic sclerosis. RA; rheumatoid arthritis. T1D; type I diabetes. SjS; Sjögren's syndrome.
- B) Expression of *IFI44L*, *MX1*, *XAF1* and *STAT1* in peripheral blood-derived B cells healthy and systemic lupus erythematosus (SLE) patients (12).

1179  
1180  
1181  
1182  
1183  
1184  
1185  
1186  
1187

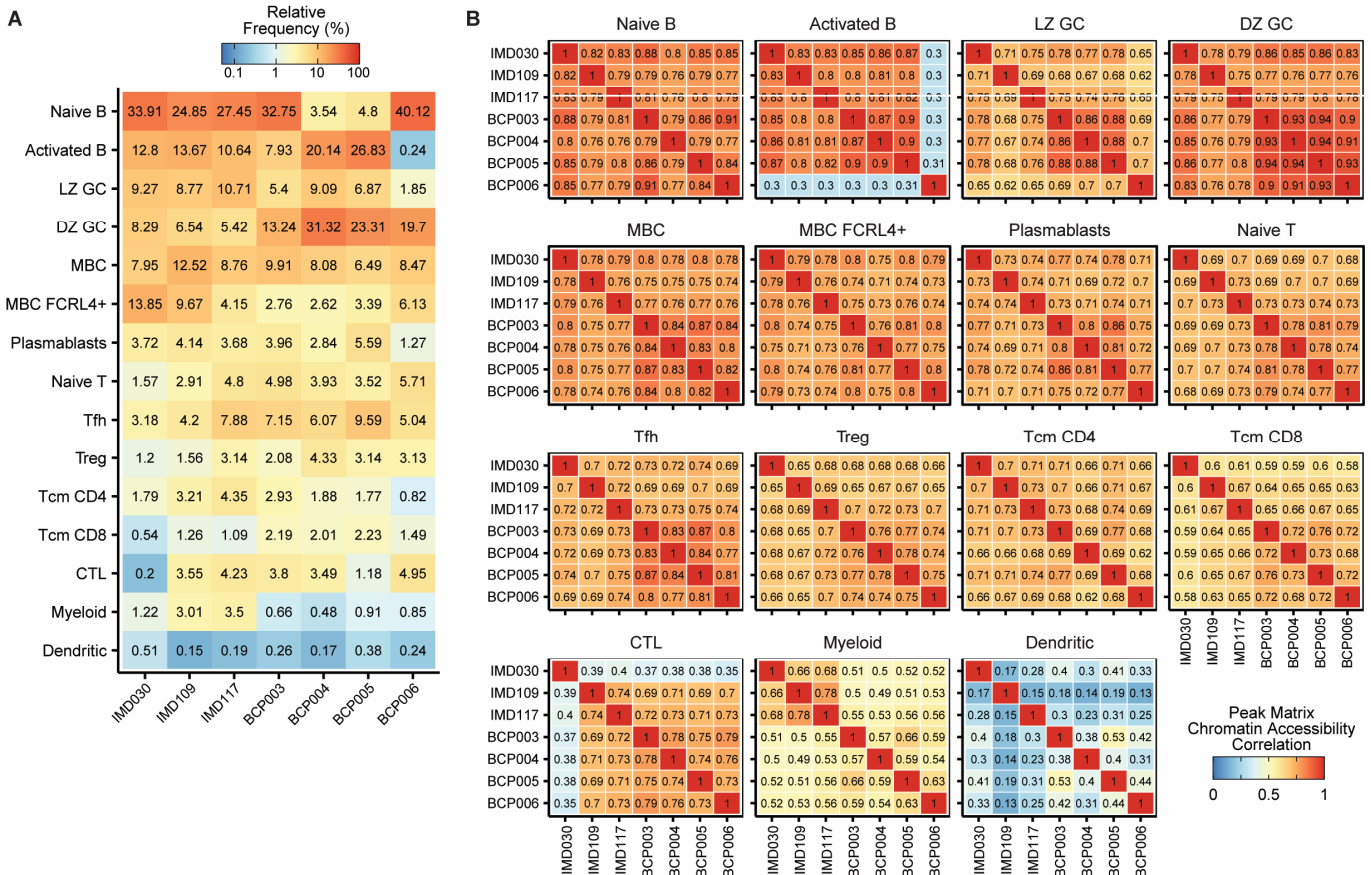

1188  
1189  
1190  
1191  
1192

**Figure S6. Reproducibility of scATAC-seq cluster frequencies and correlation of peak accessibilities between donors.**

- A) Relative frequency of high resolution scATAC-seq cell type clusters across patient donors.  
B) Spearman correlation coefficients of mean peak accessibility per cell type cluster between patient donors.

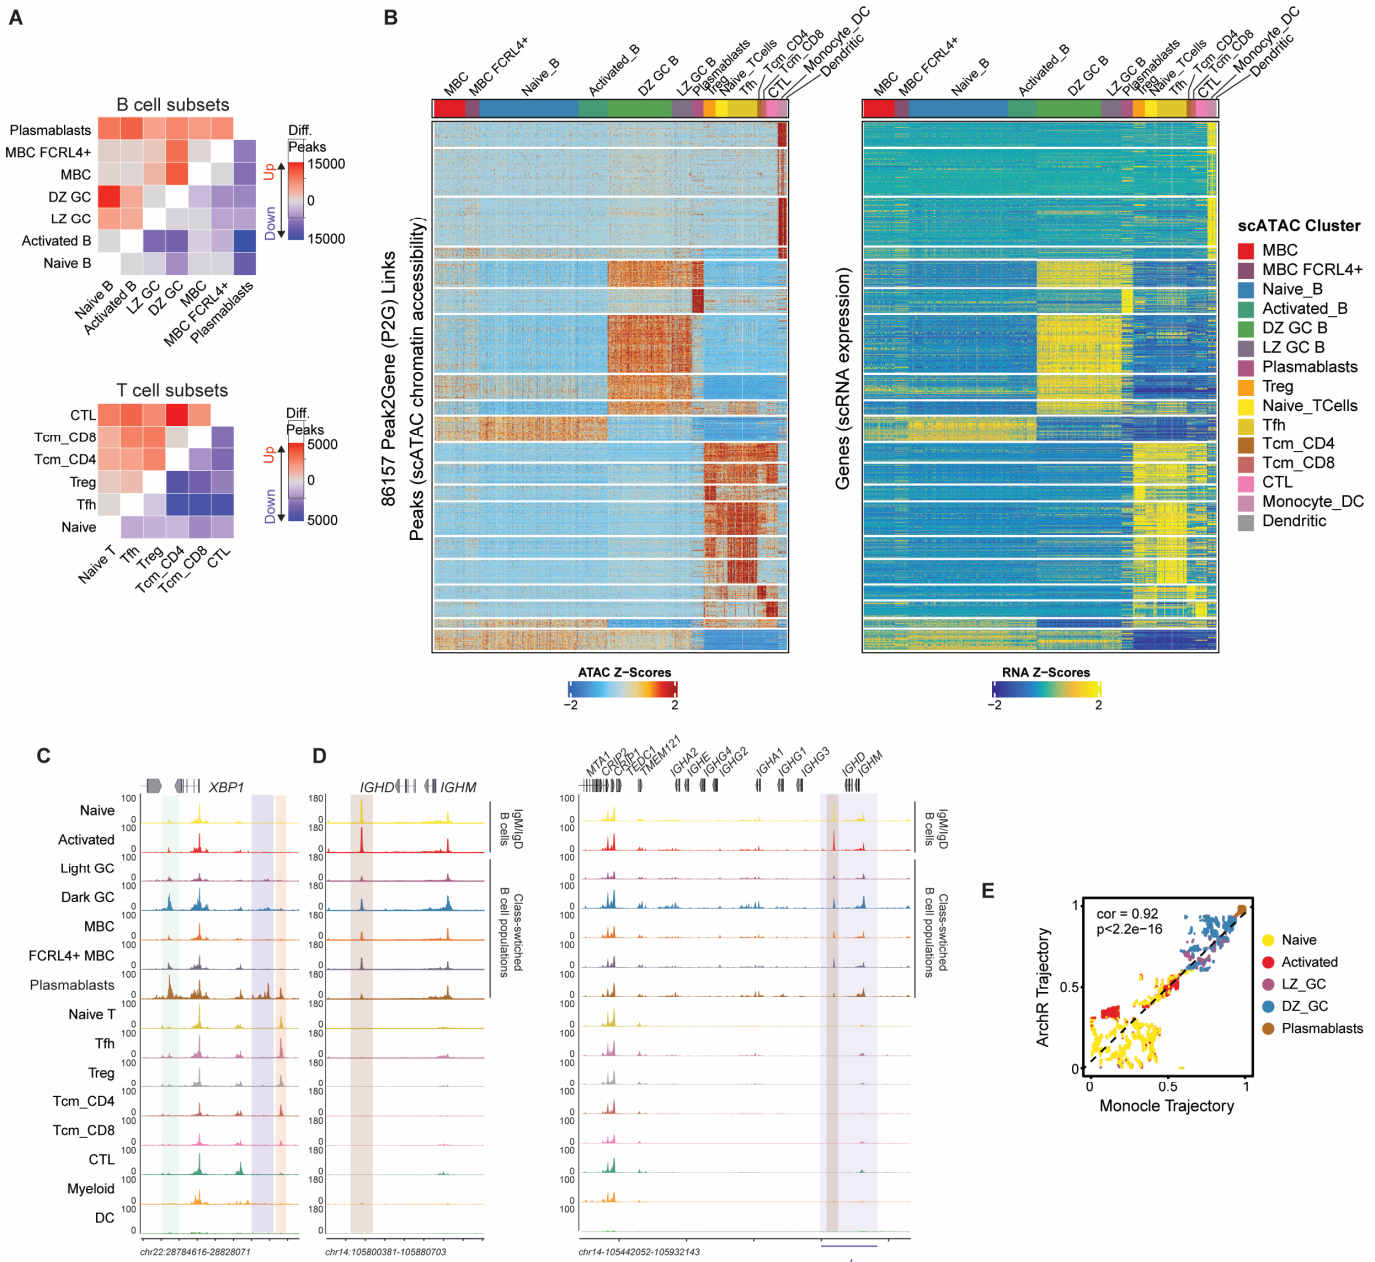

**Figure S7. Differential peak analysis of scATAC-seq clusters, peak-to-gene predictions and alternative pseudotime analysis.**

- A) Differential peak analysis of B (top) and T (bottom) cell subsets comparing number of up-regulated and down-regulated chromatin accessibility regions.
- B) Single-cell heatmaps of marker peak accessibility (scATAC) and gene expression (scRNA) for integrative peak2gene predictions in tonsil immune cell type clusters (as in Fig2A).
- C) Example genome snapshot of *XBP1* regulatory landscape. B cell-, plasmablast- and T cell-specific regulatory elements are highlighted.
- D) Genome snapshot of immunoglobulin heavy chain locus, including closer resolution of regulatory element downstream of *IGHD* and *IGHM* that is lost during class switch recombination (i.e. through deletional recombination).
- E) Correlation between two independent pseudotemporal ordering methods (ArchR and Monocle) for naïve, activated, GC and plasmablast B cell lineage. Correlation coefficient and *p* value denotes result from Pearson correlation.

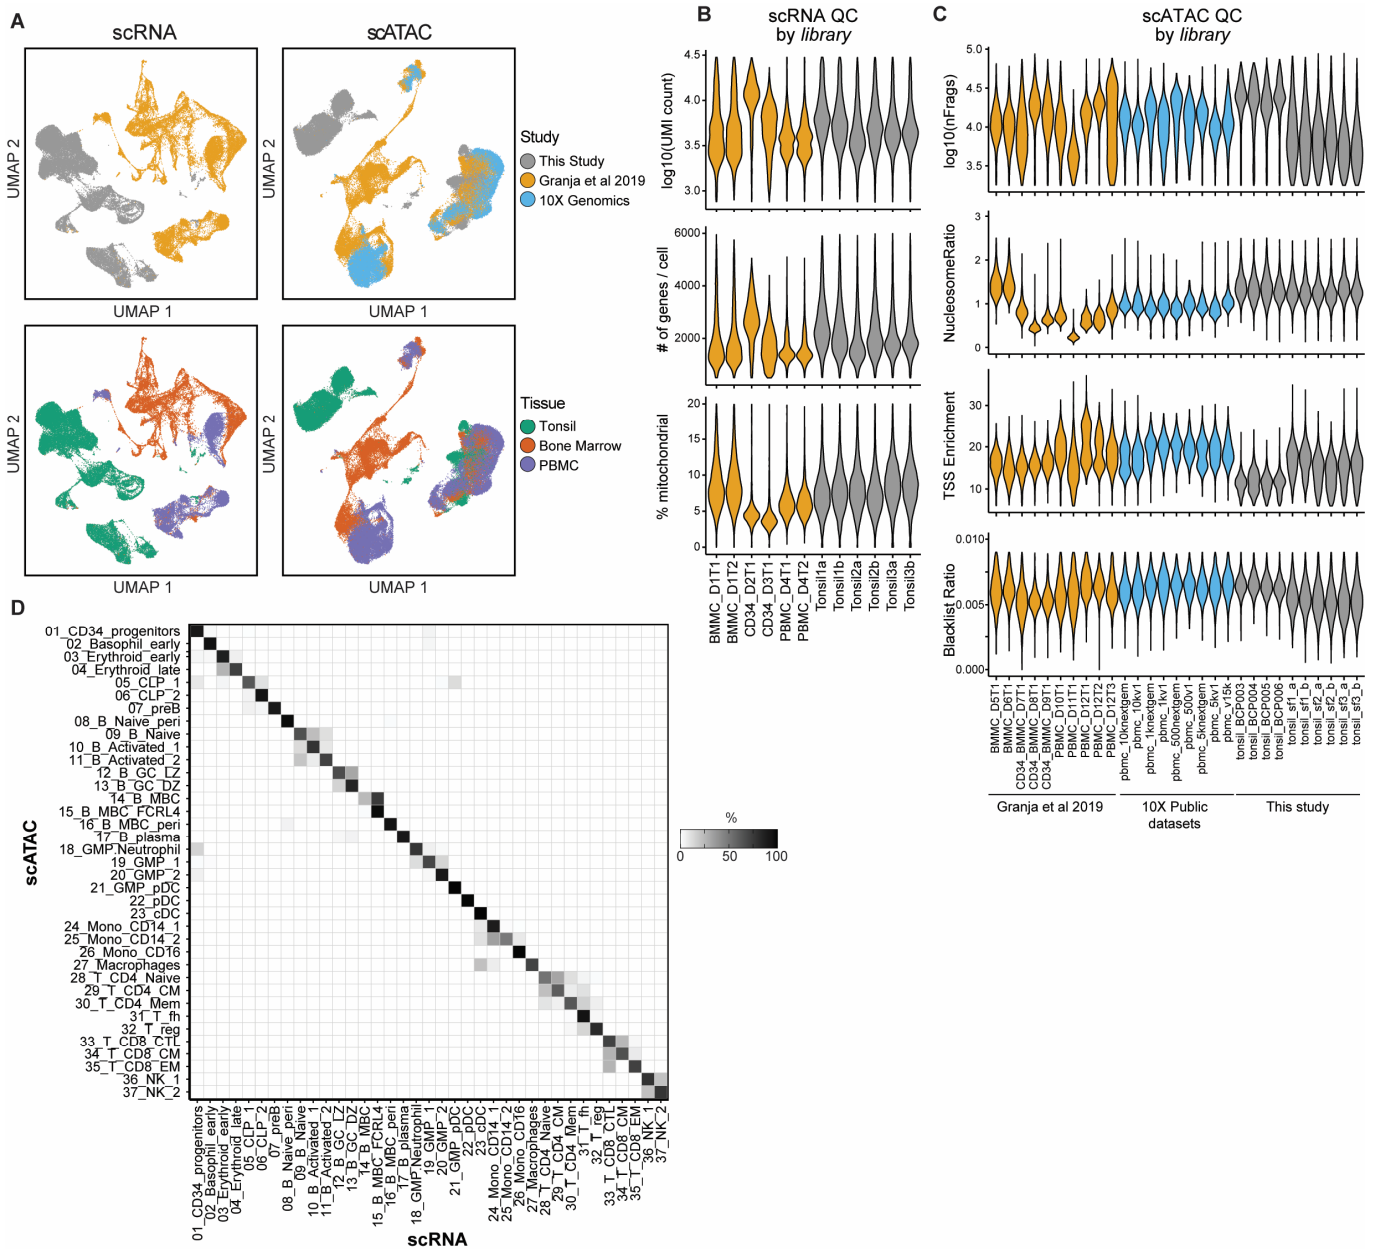

**Figure S8. Batch correction and quality control of integrated bone marrow, blood and tonsil immune scRNA-seq and scATAC-seq.**

- A) UMAP visualization of batch and tissue for tonsil, peripheral blood and bone marrow scRNA-seq and scATAC-seq datasets.
- B) Quality control metrics for scRNA-seq datasets by donor, including unique molecular identifier (UMI) counts per cell barcode, number of genes detected per cell barcode, and percentage of mitochondrial gene expression.
- C) Quality control metrics for scATAC-seq datasets by donor, including number of unique fragments per cell barcode, ratio of nucleosomal to non-nucleosomal fragment sizes, transcription start site enrichment score, and ratio of fragments in genomic blacklist regions (see ArchR for details).
- D) Confusion matrix depicting overlap between transferred scRNA-seq cluster identities to scATAC-seq clusters.



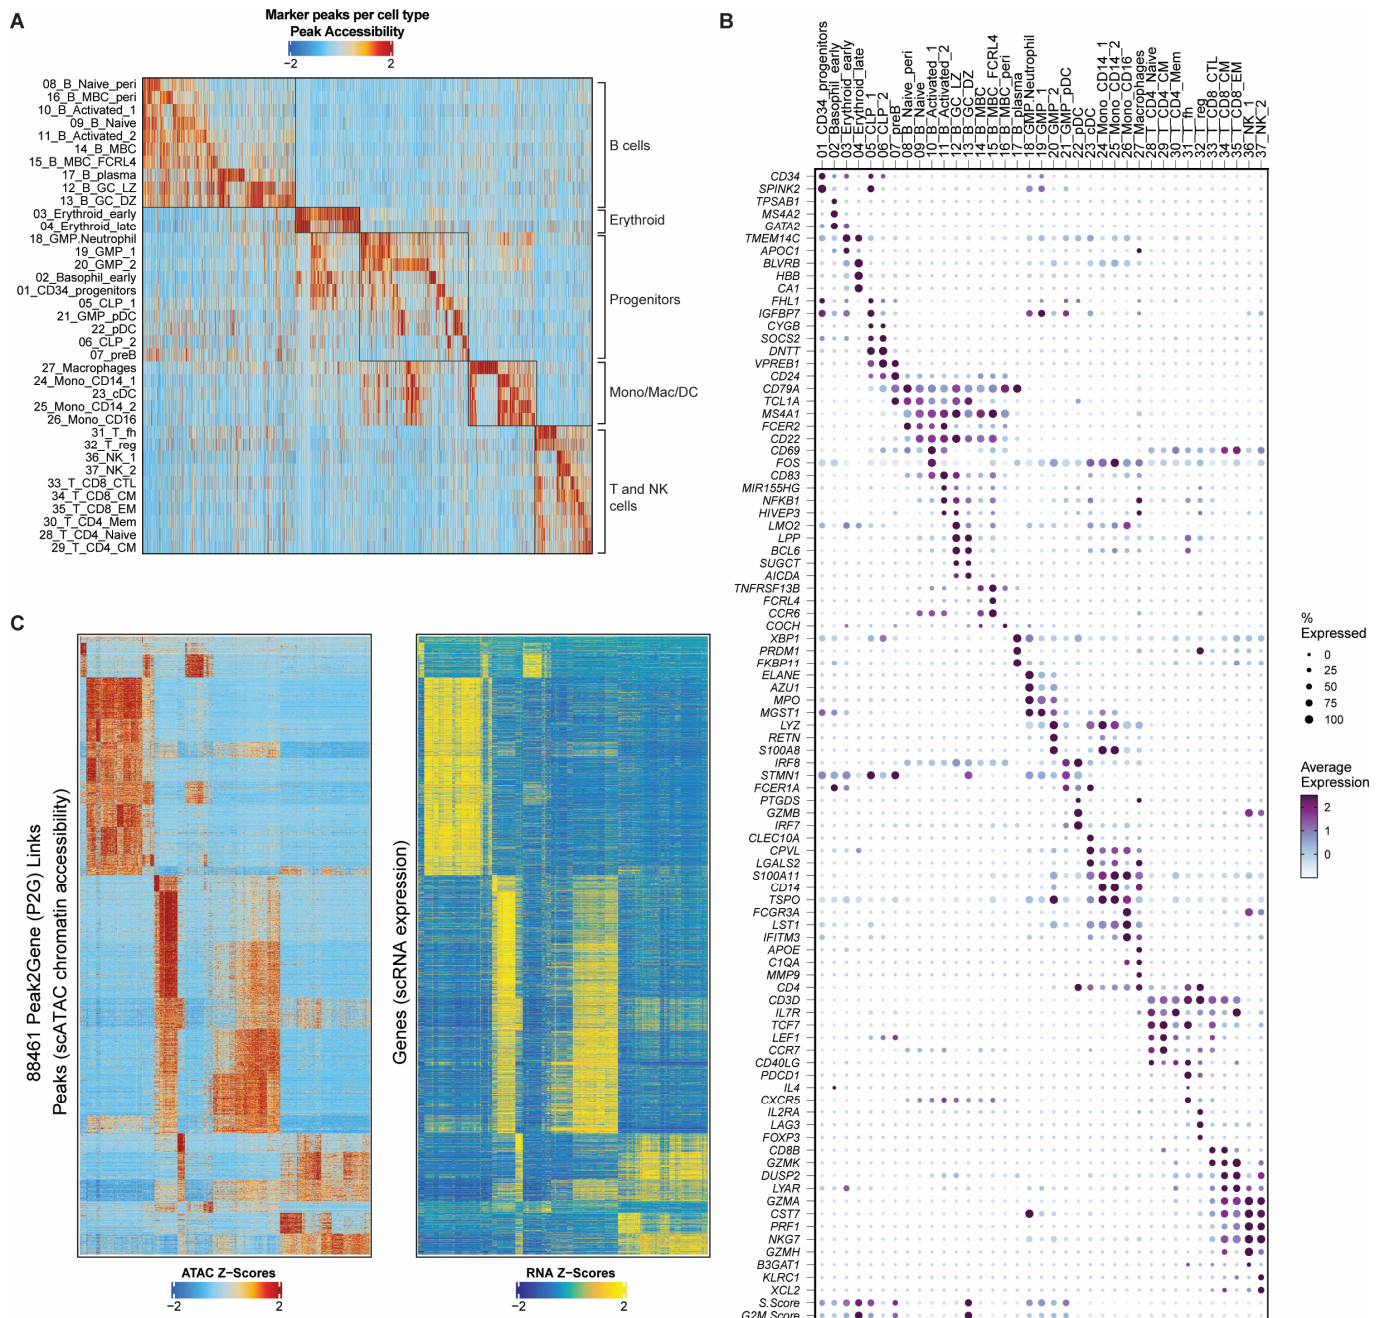

**Figure S9. Integrated bone marrow, blood and tonsil scRNA-seq and scATAC-seq markers.**

- A) Expression of top marker genes for scRNA-seq clusters of integrated bone marrow, blood and tonsil dataset.  
 B) Chromatin accessibility at cluster-specific peaks for scATAC-seq clusters of integrated bone marrow, blood and tonsil dataset.  
 C) Peak accessibility (scATAC) and gene expression (scRNA) for integrative peak2gene predictions in tonsil, peripheral blood and bone marrow immune cell type clusters (as in Fig3A).

1216  
1217  
1218  
1219  
1220  
1221  
1222  
1223

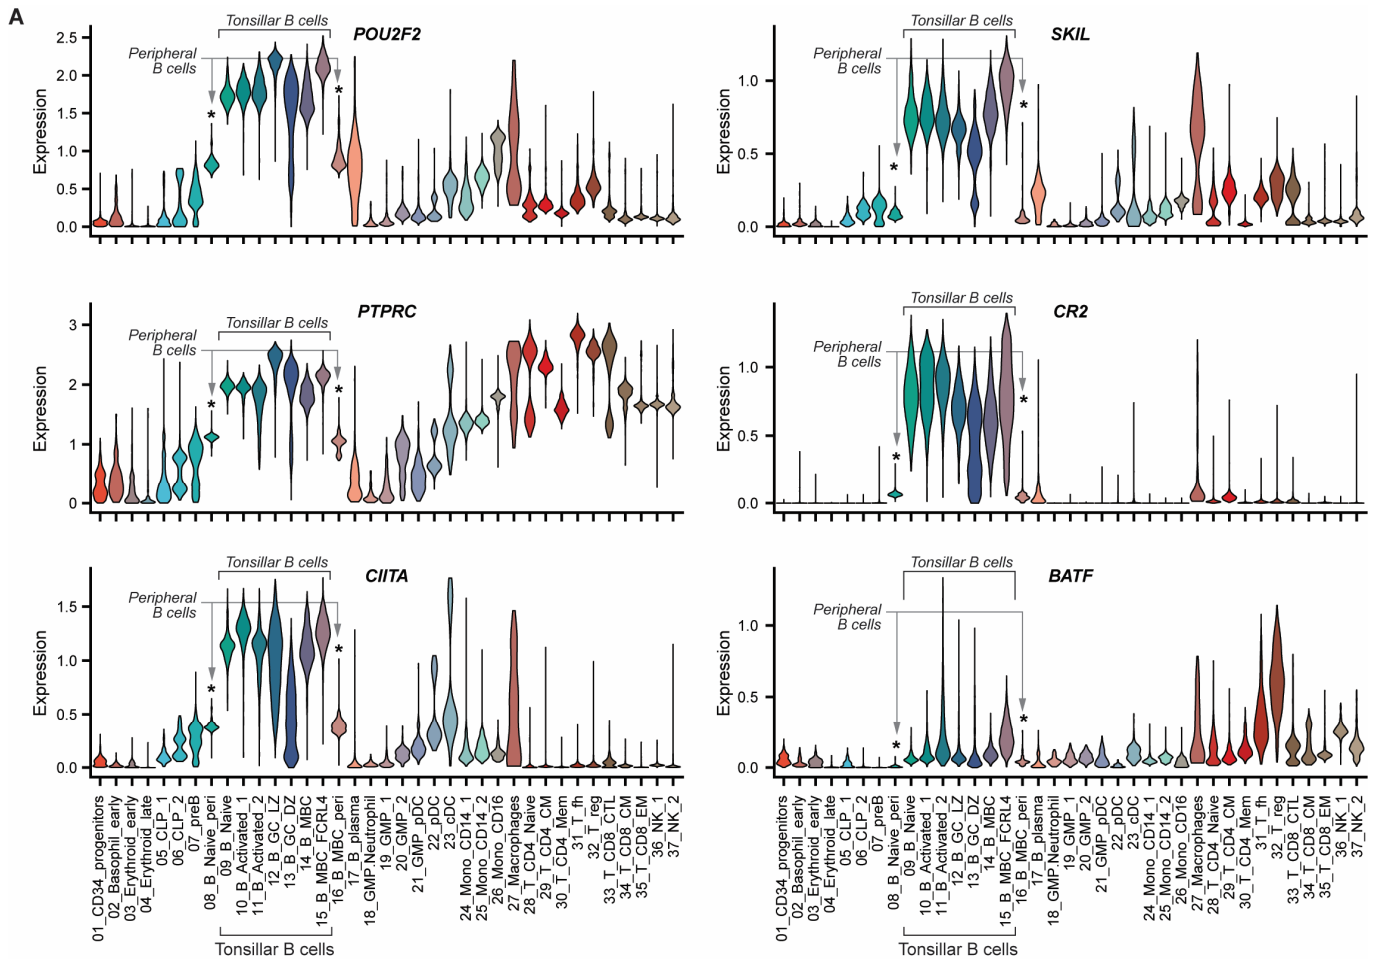

**Figure S10. Tonsil B cell-enriched gene expression markers compared to peripheral blood B cells.**

A) Expression of genes significantly differentially expressed between tonsil-specific naïve or memory B cell clusters compared to peripheral blood naïve or memory B cell clusters.

1224  
1225  
1226  
1227

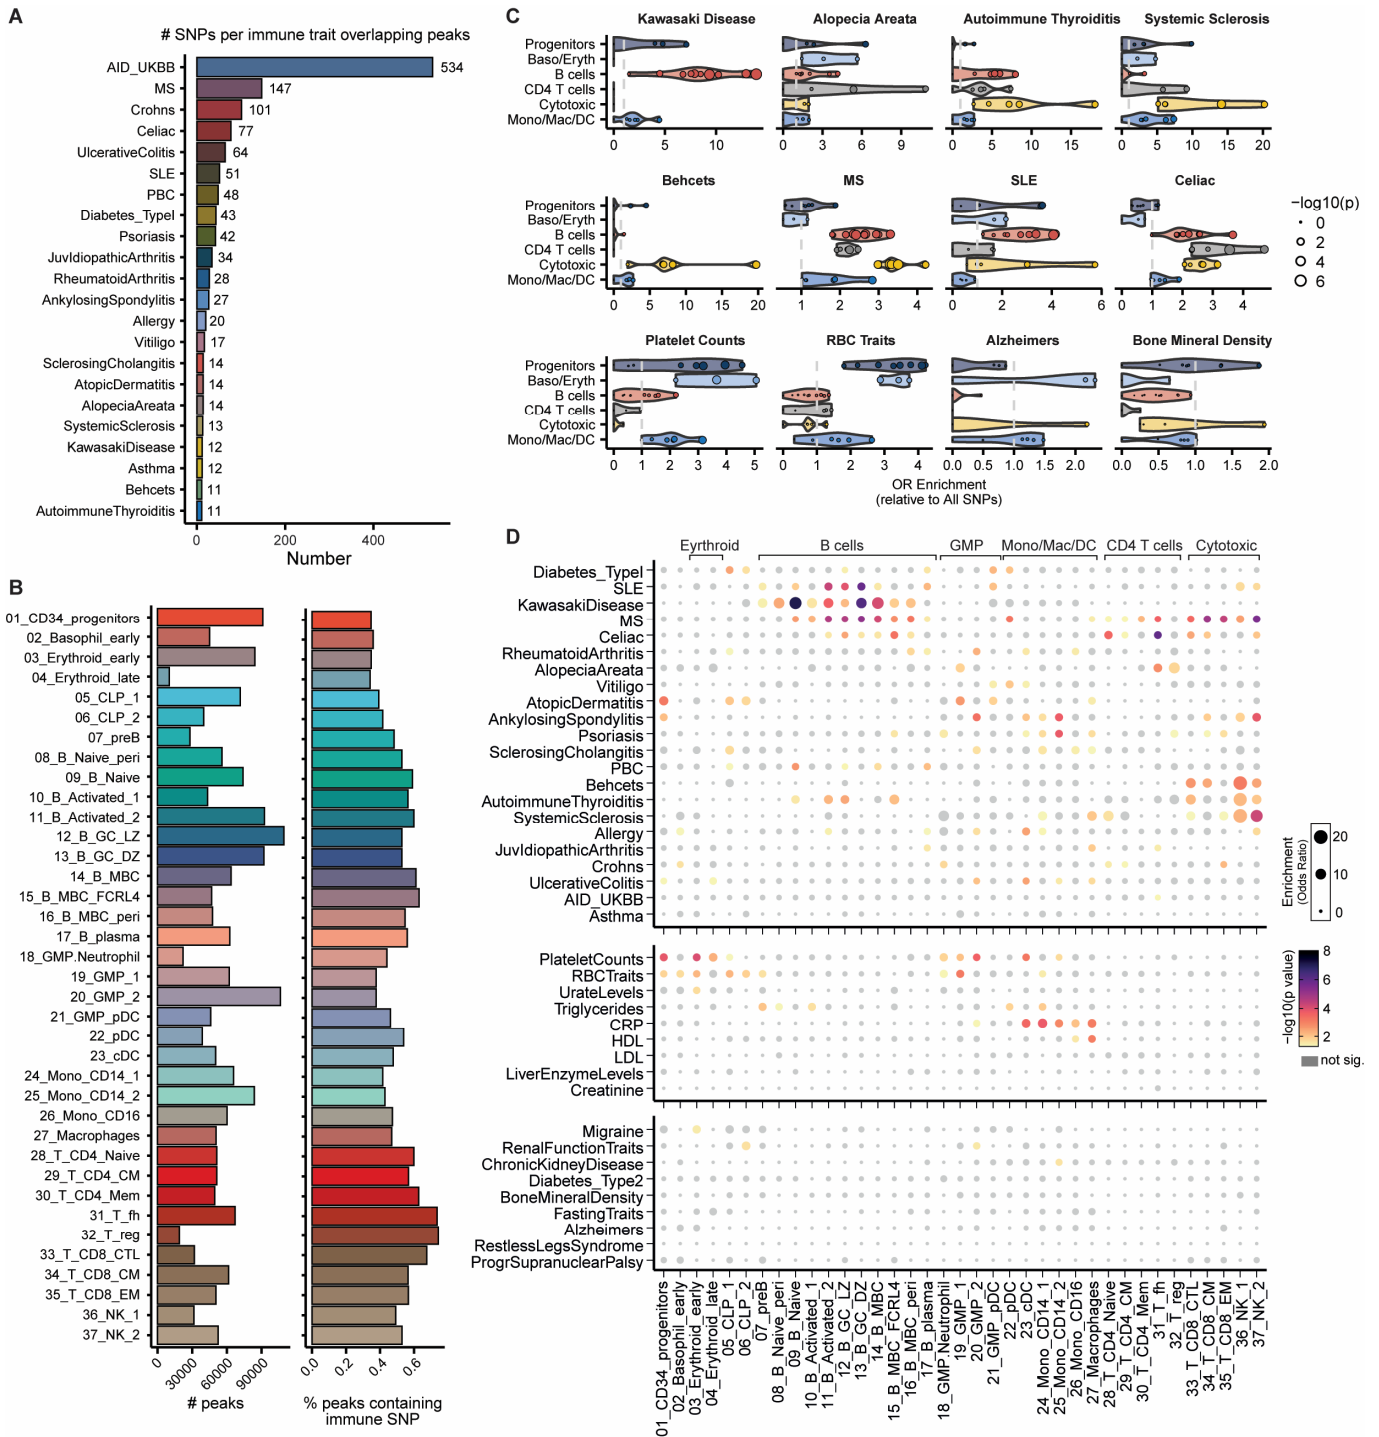

**Figure S11. Enrichment of fine-mapped autoimmune variants in immune cell subsets.**

A) Number of fine-mapped SNPs per autoimmune trait that overlap with a chromatin accessibility peak in the integrated human bone marrow, peripheral blood and tonsil scATAC-seq atlas. AID\_UKBB represents variants identified from fine-mapping a combination of datasets from diverse autoimmune traits. AID; autoimmune disease. MS; multiple sclerosis. SLE; systemic lupus erythematosus. PBC; primary biliary cirrhosis.

B) Number of peaks identified in each scATAC-seq cell type cluster (left) and the percentage of those peaks that overlap with an autoimmune-associated SNP.

C) Fisher enrichment test results for variants specific to selected traits in cell type-specific chromatin. Individual points represent single cell type clusters, separated into five broad lineages. Dot size reflects level of significance of enrichment.

D) Fisher enrichment test results for trait-specific variants in cell type-specific chromatin across all traits in fine-mapped resources analyzed. Dot size conveys enrichment (odds ratio) and color denotes significance of enrichment.

1228  
1229  
1230  
1231  
1232  
1233  
1234  
1235  
1236  
1237  
1238  
1239

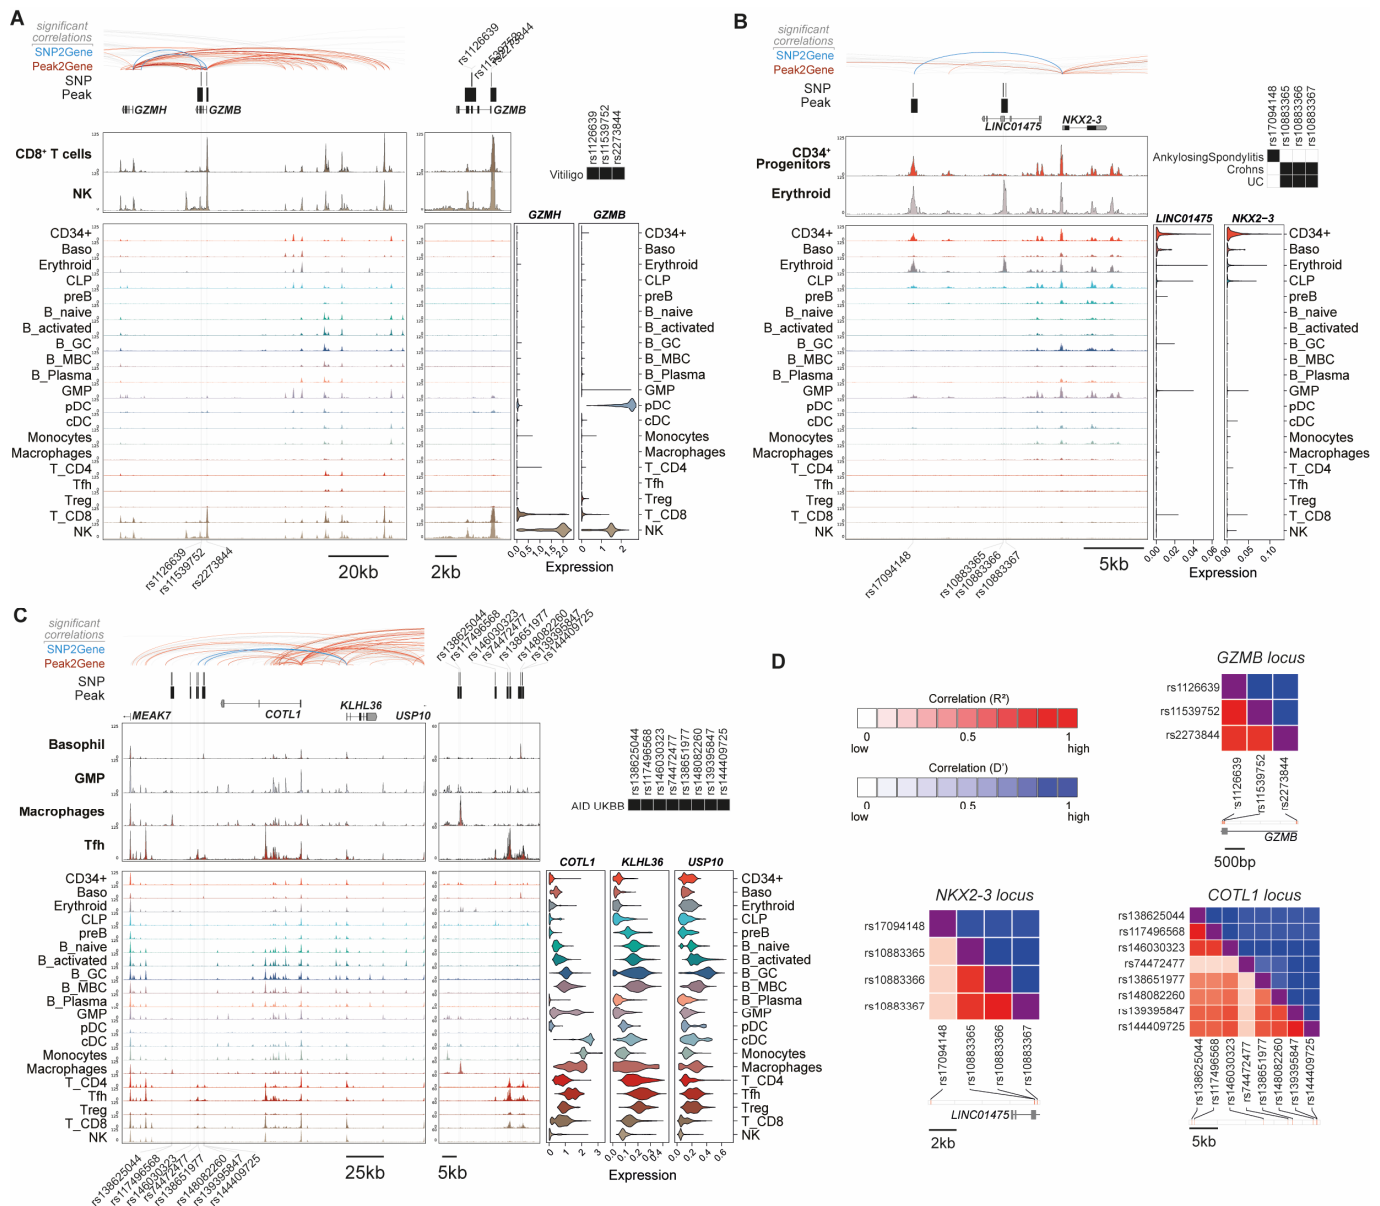

**Figure S12. Genome snapshots of fine-mapped autoimmune variants at *GZMB/GZMH*, *NKX2-3* and *COTL1/KLHL36* loci.**

- A) Genomic snapshot of fine-mapped autoimmune-associated GWAS variants at the *GZMB/GZMH* locus. Significantly correlated peak2gene linkages colored in red and significant links between SNPs and gene promoters (SNP2gene) in blue and bold. Significant associations between individual SNPs and autoimmune diseases are shown in black boxes and gene expression is shown as violin plots for matched populations in scATAC tracks.
- B) Same as A), at the *NKX2-3* locus. UC; ulcerative colitis.
- C) Same as A), at the *COTL1/KLHL36* locus. AID; autoimmune disease.
- D) Linkage disequilibrium heatmaps for SNPs at loci depicted in A-C.  $D'$  denotes normalized linkage disequilibrium;  $R^2$  denotes Pearson coefficient of correlation.

1240  
1241  
1242  
1243  
1244  
1245  
1246  
1247  
1248  
1249  
1250



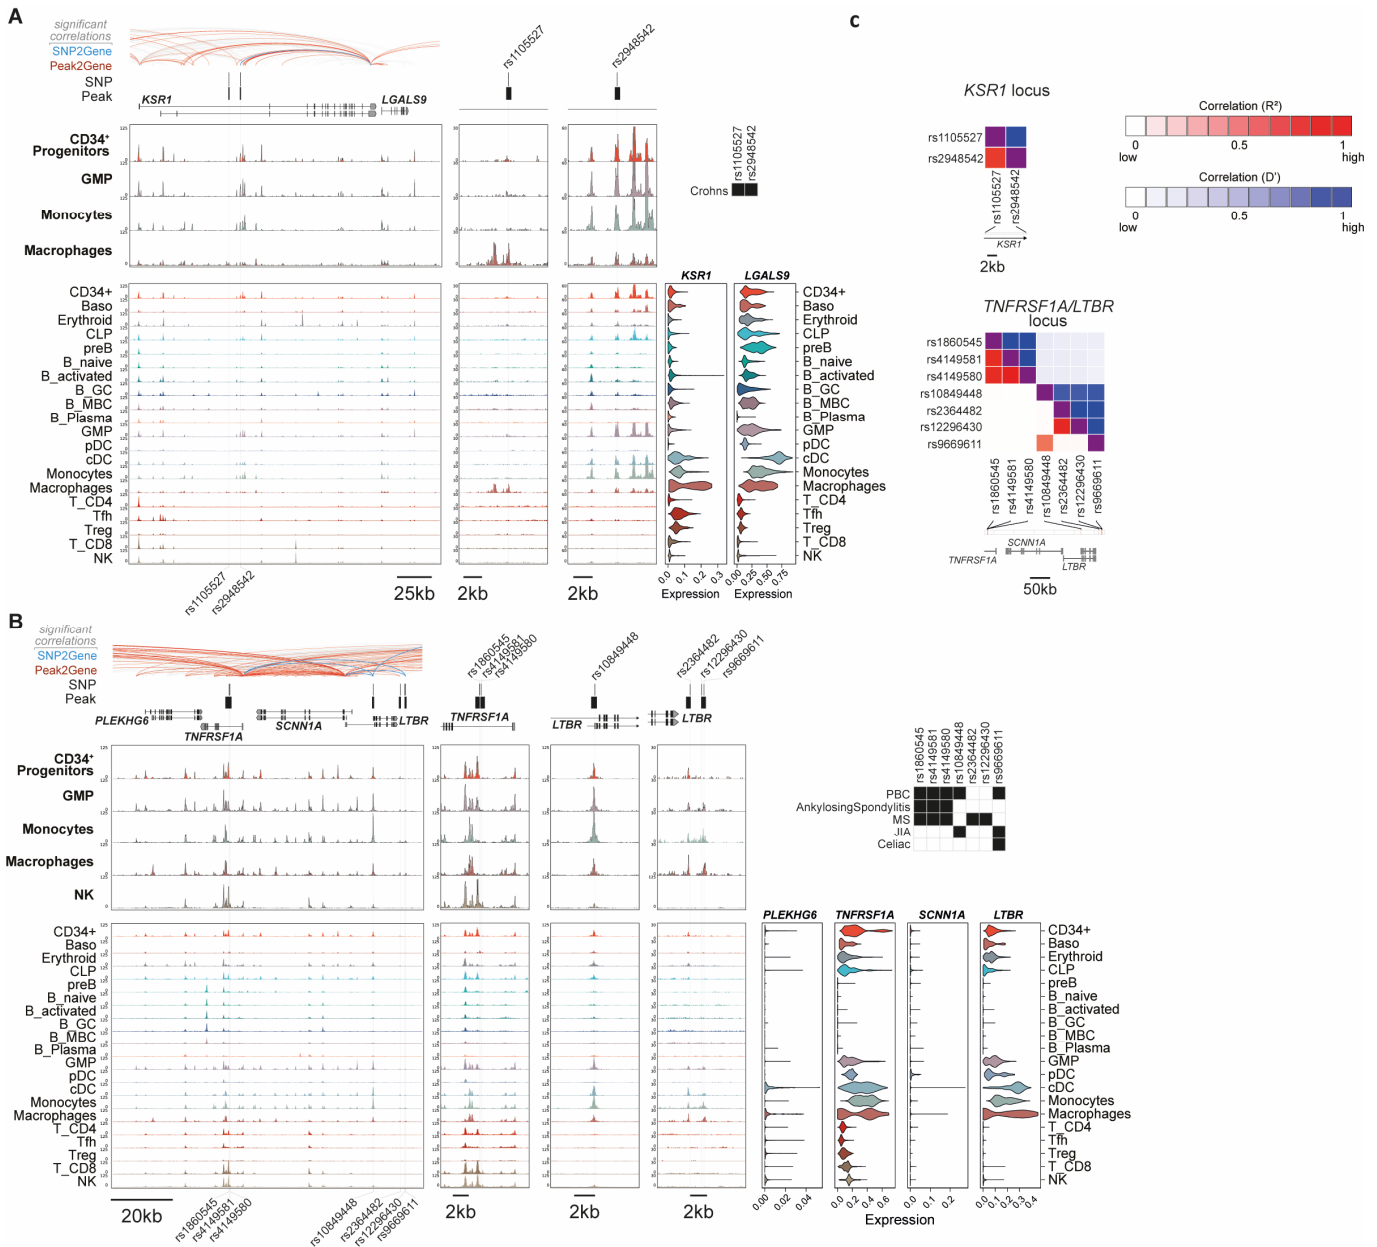

**Figure S13. Genome snapshots of fine-mapped autoimmune variants at *KSR1/LGALS9* and *TNFRSF1A/LTBR* loci.**

- A) Genomic snapshot of fine-mapped autoimmune-associated GWAS variants at the *KSR1/LGALS9* locus. Significantly correlated peak2gene linkages colored in red and significant links between SNPs and gene promoters (SNP2gene) in blue and bold. Significant associations between individual SNPs and autoimmune diseases are shown in black boxes and gene expression is shown as violin plots for matched populations in scATAC tracks.
- B) Same as A), at the *TNFRSF1A/LTBR* locus. PBC; primary biliary cirrhosis. MS; multiple sclerosis. JIA; juvenile idiopathic arthritis.
- C) Linkage disequilibrium heatmaps for SNPs at loci depicted in A and B. D' denotes normalized linkage disequilibrium;  $R^2$  denotes Pearson coefficient of correlation.

1251  
1252  
1253  
1254  
1255  
1256  
1257  
1258  
1259  
1260  
1261  
1262

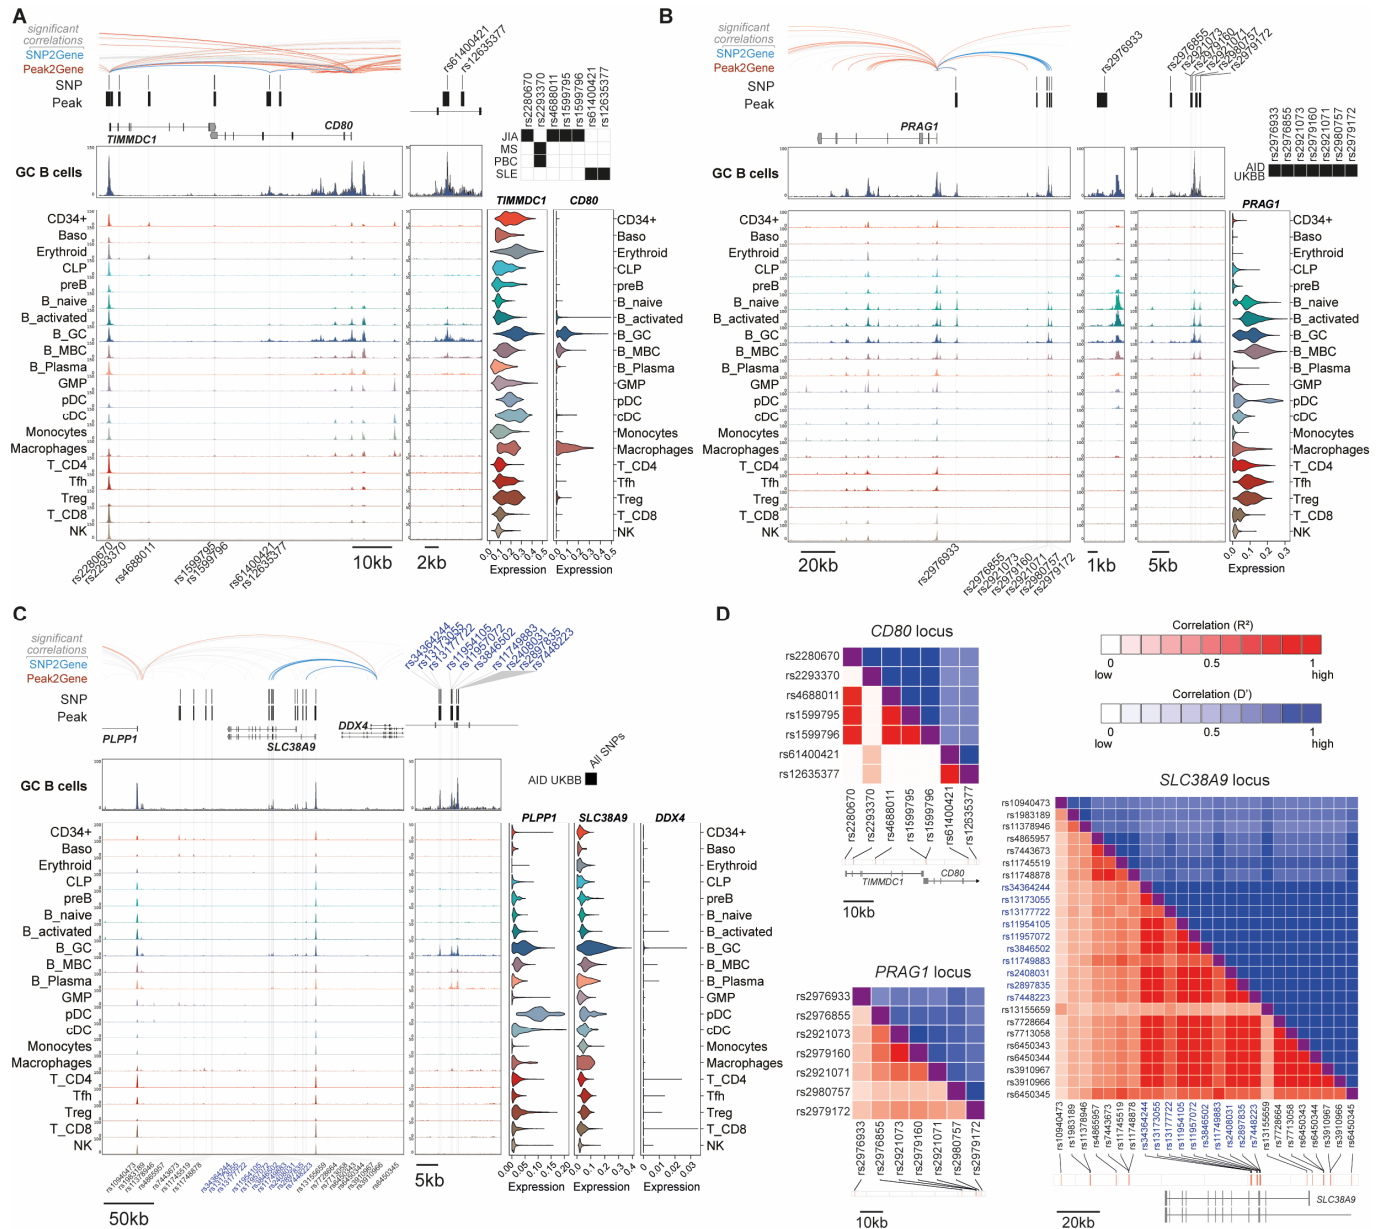

**Figure S14. Genome snapshots of germinal center-associated cell type-specific regulatory activity at fine-mapped autoimmune variants at *CD80*, *PRAG1* and *SLC38A9/DDX4* loci.**  
 A) Genomic snapshot of fine-mapped autoimmune-associated GWAS variants at the *CD80* locus. Significantly correlated peak2gene linkages colored in red and significant links between SNPs and gene promoters (SNP2gene) in blue and bold. Significant associations between individual SNPs and autoimmune diseases are shown in black boxes and gene expression is shown as violin plots for matched populations in scATAC tracks. PBC; primary biliary cirrhosis. MS; multiple sclerosis. JIA; juvenile idiopathic arthritis. SLE; systemic lupus erythematosus.  
 B) Same as A), at the *PRAG1* locus. AID; autoimmune disease.  
 C) Same as A), at the *SLC38A9/DDX4* locus.  
 D) Linkage disequilibrium heatmaps for SNPs at loci depicted in A and B. D' denotes normalized linkage disequilibrium; R<sup>2</sup> denotes Pearson coefficient of correlation.

1263  
1264  
1265  
1266  
1267  
1268  
1269  
1270  
1271  
1272  
1273  
1274

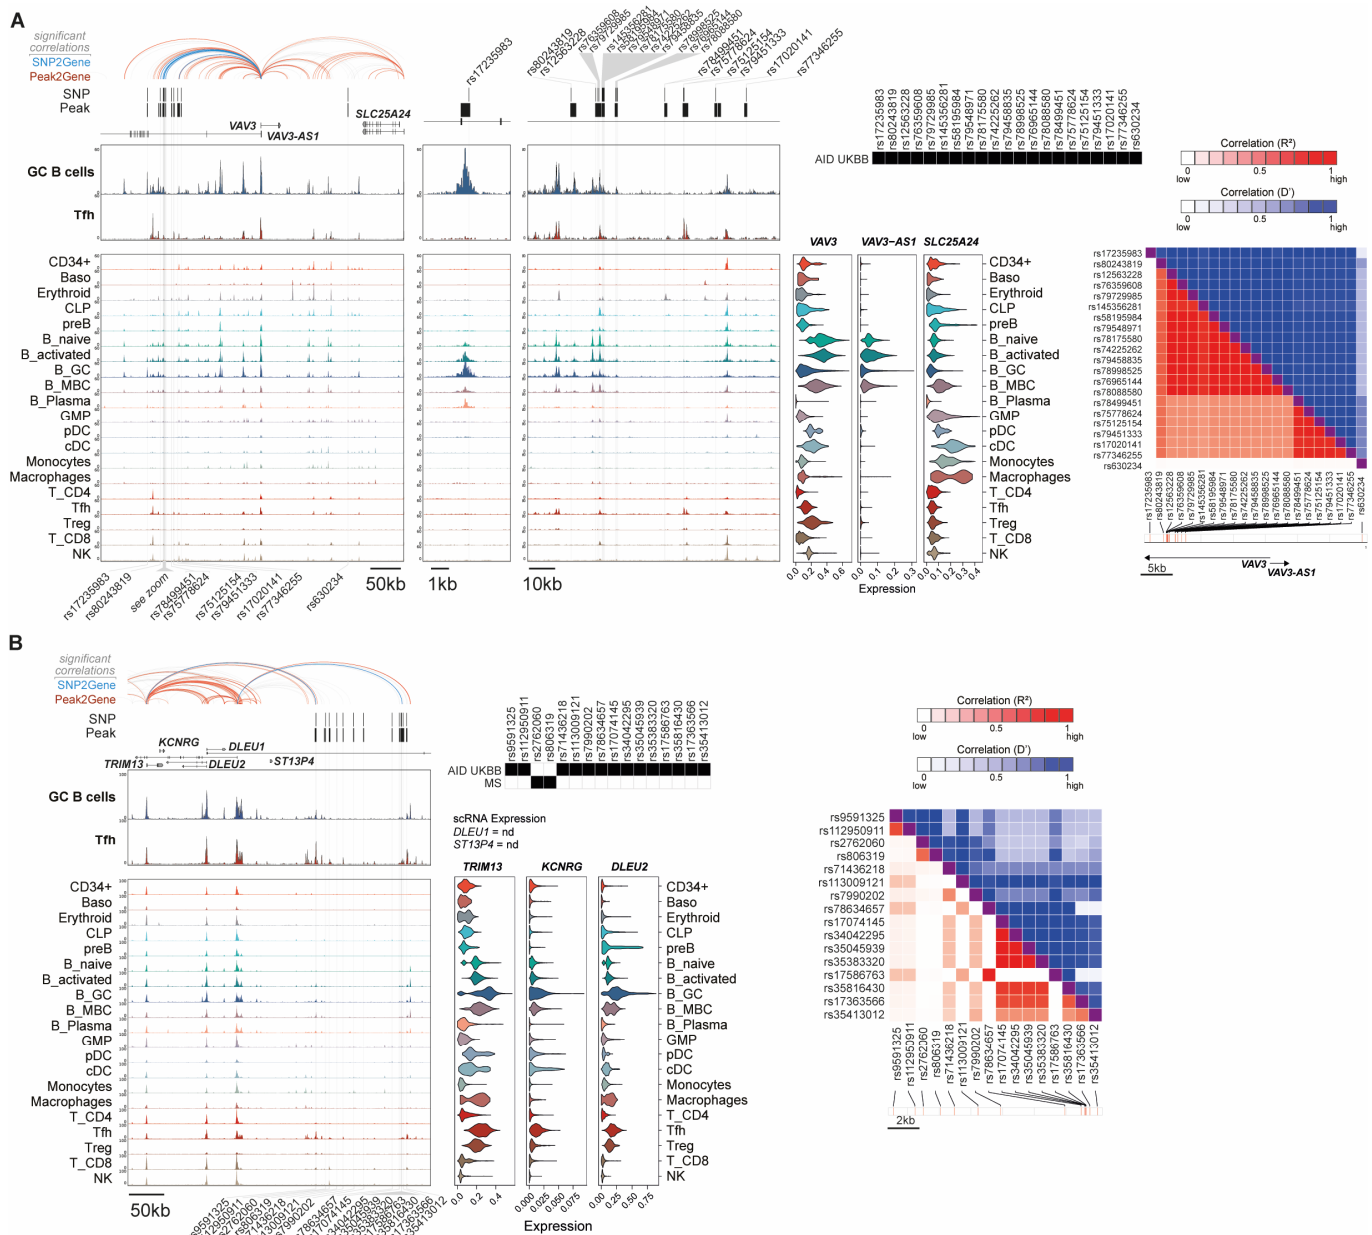

**Figure S15. Genome snapshots of germinal center-associated cell type-specific regulatory activity at fine-mapped autoimmune variants at *VAV3* and *DLEU2* loci.**

A) Genomic snapshot of fine-mapped autoimmune-associated GWAS variants at the *VAV3* locus. Significantly correlated peak2gene linkages colored in red and significant links between SNPs and gene promoters (SNP2gene) in blue and bold. Significant associations between individual SNPs and autoimmune diseases are shown in black boxes and gene expression is shown as violin plots for matched populations in scATAC tracks. Linkage disequilibrium heatmaps are also shown separately. D' denotes normalized linkage disequilibrium;  $R^2$  denotes Pearson coefficient of correlation. AID; autoimmune disease.

B) Same as A), at the *DLEU2* locus. MS; multiple sclerosis.

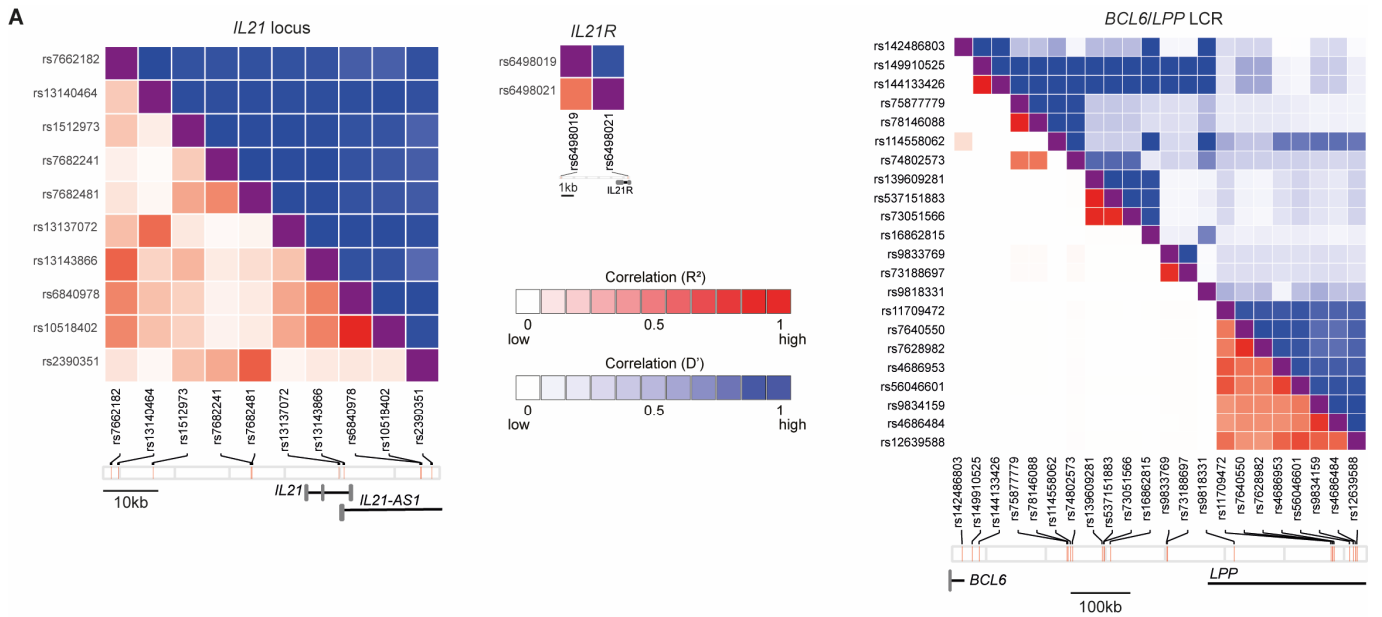

1285  
1286  
1287  
1288

**Figure S16. Linkage disequilibrium scores for variants at *IL21*, *IL21R* and *BCL6* loci.**

A) Linkage disequilibrium heatmaps for SNPs at *IL21*, *IL21R* and *BCL6/LPP* loci depicted in Fig 5. D' denotes normalized linkage disequilibrium; R<sup>2</sup> denotes Pearson coefficient of correlation.



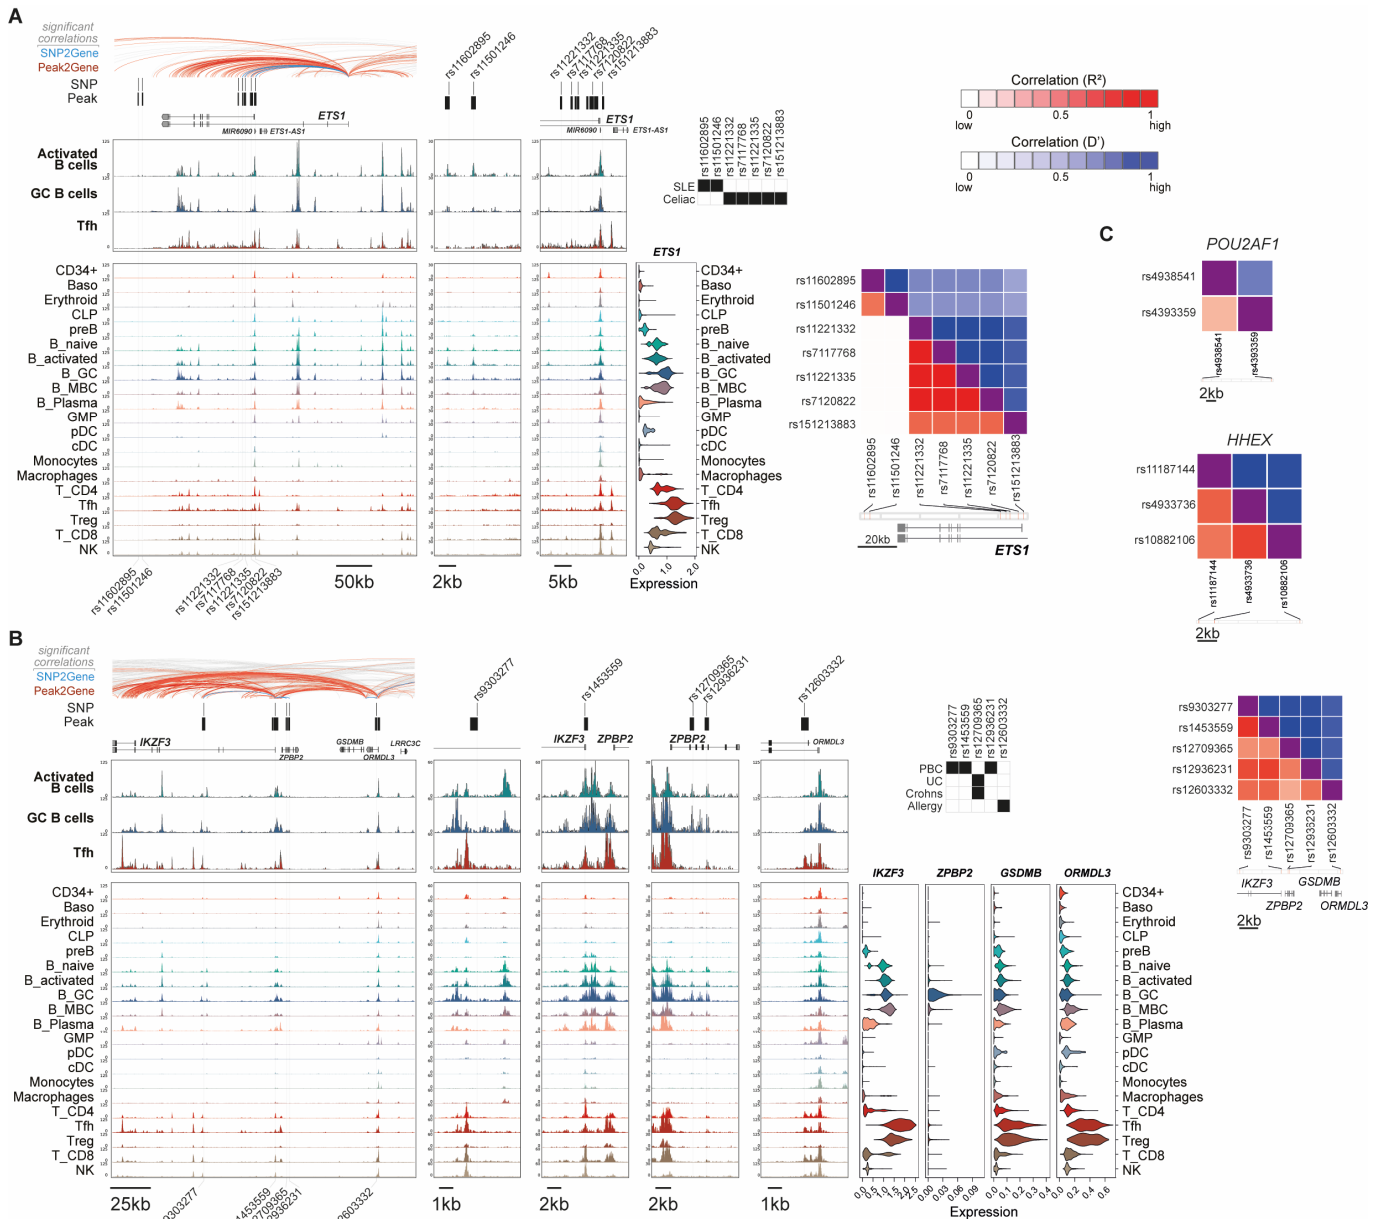

**Figure S17. Genome snapshots of fine-mapped autoimmune variants at *ETS1* and *IKZF3* loci.**

A) Genomic snapshot of fine-mapped autoimmune-associated GWAS variants at the *ETS1* locus. Significantly correlated peak2gene linkages colored in red and significant links between SNPs and gene promoters (SNP2gene) in blue and bold. Significant associations between individual SNPs and autoimmune diseases are shown in black boxes and gene expression is shown as violin plots for matched populations in scATAC tracks. Linkage disequilibrium heatmap is also shown. D' denotes normalized linkage disequilibrium; R<sup>2</sup> denotes Pearson coefficient of correlation. SLE; systemic lupus erythematosus.

B) Same as A), at the *IKZF3* locus. PBC; primary biliary cirrhosis. UC; ulcerative colitis.

C) Linkage disequilibrium heatmaps for SNPs at *POU2AF1* and *HHEX* loci depicted in Fig6. D' denotes normalized linkage disequilibrium; R<sup>2</sup> denotes Pearson coefficient of correlation.

1289  
1290  
1291  
1292  
1293  
1294  
1295  
1296  
1297  
1298

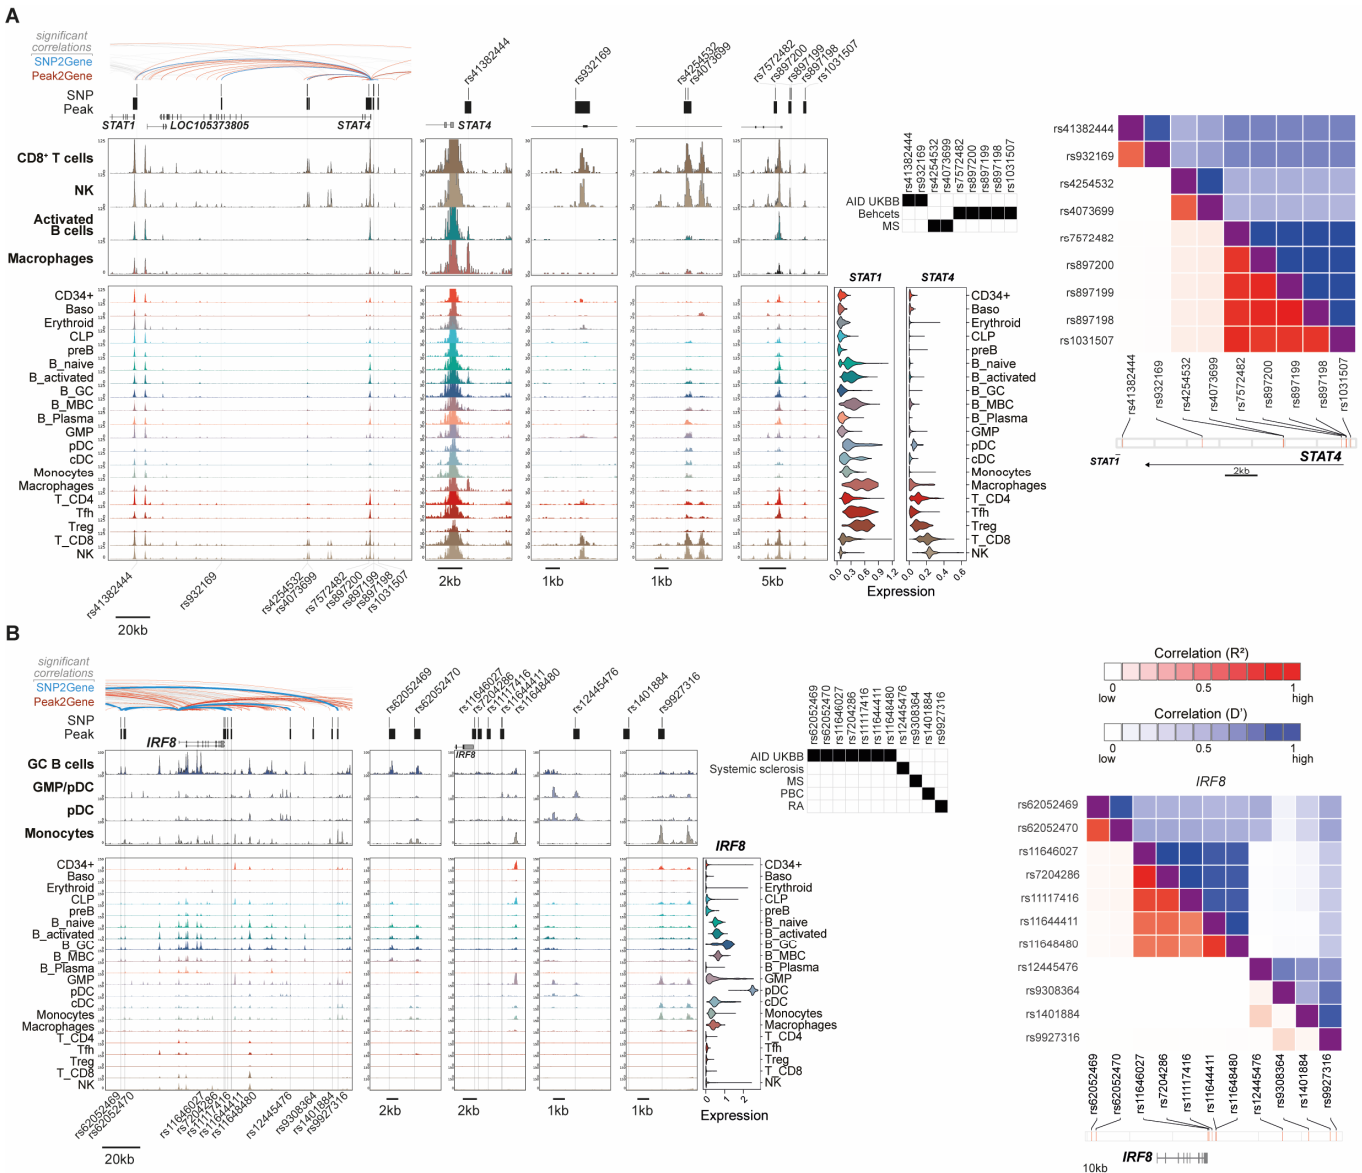

**Figure S18. Genome snapshots of fine-mapped autoimmune variants at *STAT4* and *IRF8* loci.**

A) Genomic snapshot of fine-mapped autoimmune-associated GWAS variants at the *STAT4* locus. Significantly correlated peak2gene linkages colored in red and significant links between SNPs and gene promoters (SNP2gene) in blue and bold. Significant associations between individual SNPs and autoimmune diseases are shown in black boxes and gene expression is shown as violin plots for matched populations in scATAC tracks. Linkage disequilibrium heatmap is also shown. D' denotes normalized linkage disequilibrium; R<sup>2</sup> denotes Pearson coefficient of correlation. AID; autoimmune disease. MS; multiple sclerosis.

B) Same as A), at the *IRF8* locus. PBC; primary biliary cirrhosis. RA; rheumatoid arthritis.

1299  
1300  
1301  
1302  
1303  
1304  
1305  
1306  
1307

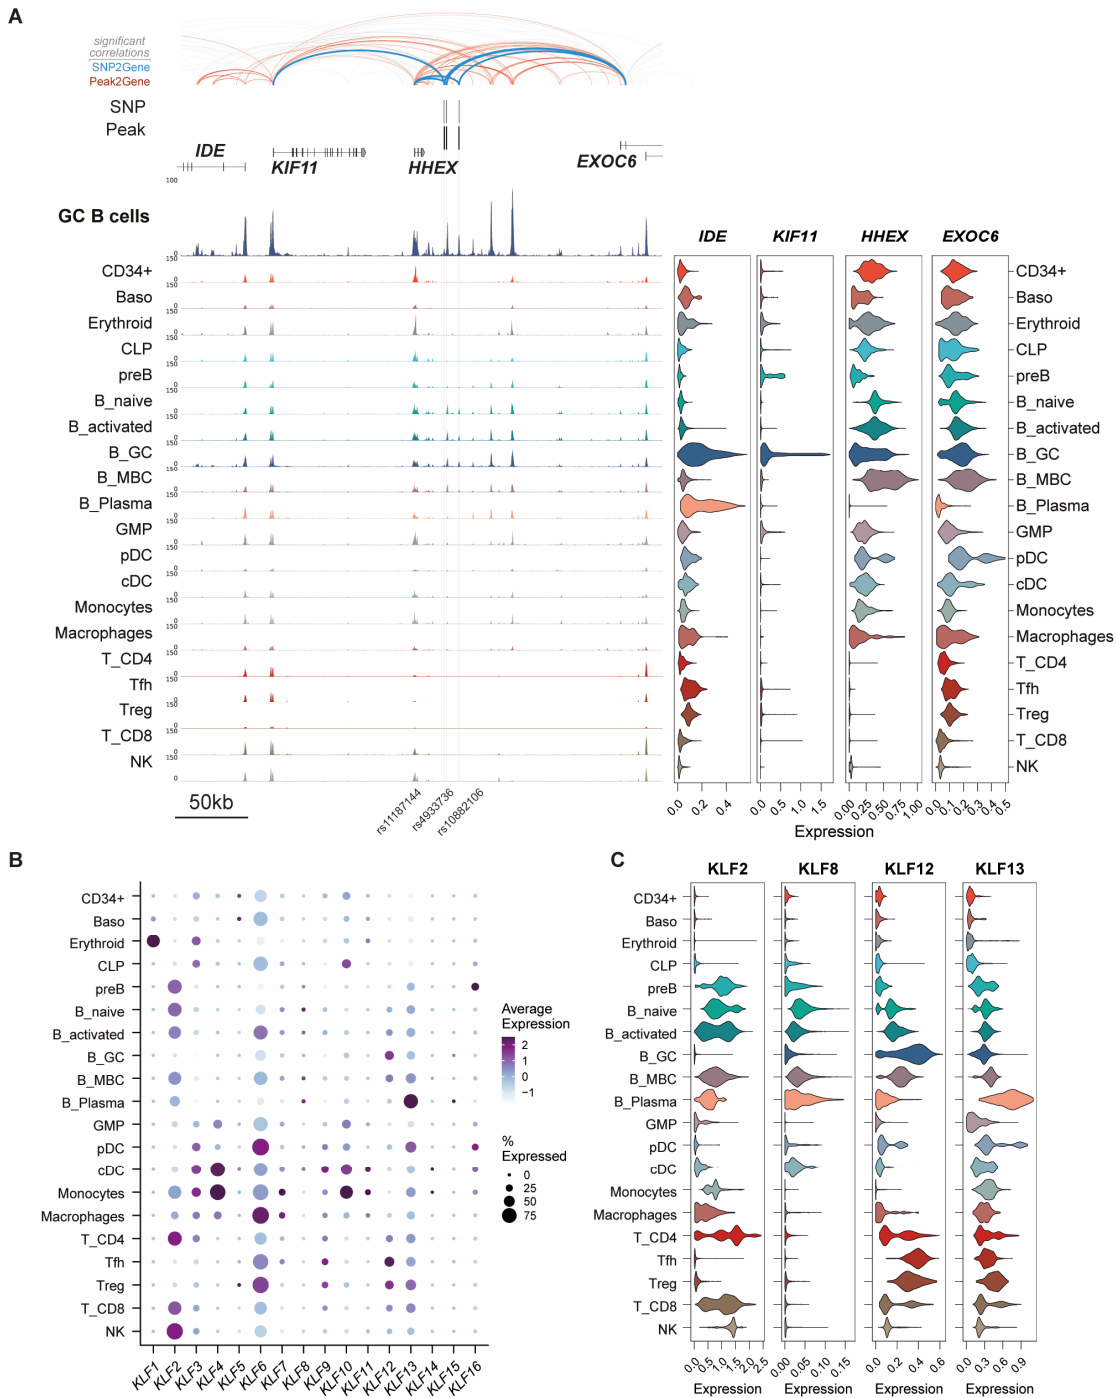

**Figure S19. Genomic landscape at *HHEX* and expression of *KLF* family transcription factors.**

- A) Broader view of the *HHEX* locus (see Fig6b), showing significantly correlated peak2gene links and gene expression of neighboring genes *KIF11* and *EXOC6*.
- B) Mean expression of all *KLF* family transcription factors detected in scRNA-seq dataset. Dot size denotes percent of cluster in which gene is detected.
- C) Single-cell expression of *KLF2*, *KLF8*, *KLF12* and *KLF13*, with highest expression in B cell subsets.

1308  
1309  
1310  
1311  
1312  
1313  
1314  
1315

1316 **Table S1. CyTOF phenotyping antibody panel.**

| metal     | marker        | clone name    | clone source    |
|-----------|---------------|---------------|-----------------|
| Y         | CD45(1)       | HI30          | DVS             |
| Pd        | CD45(2)       | HI30          | Biolegend       |
| Pd        | CD45(3)       | HI30          | Biolegend       |
| Pd        | CD45(4)       | HI30          | Biolegend       |
| In        | CD45(5)       | HI30          | Biolegend       |
| In        | CD57          | HCD57         | Biolegend       |
| La        | CD16          | 3G8           | Biolegend       |
| Pr        |               |               |                 |
| Nd        | CD45RO        | UCHL1         | Biolegend       |
| Nd        |               |               |                 |
| Nd        |               |               |                 |
| Nd        | CD33          | WM53          | Biolegend       |
| Nd        | CD14          | M5E2          | Biolegend       |
| Nd        |               |               |                 |
| Sm        | CD20          | 2H7           | Biolegend       |
| Nd        |               |               |                 |
| Sm        | CD25          | 2A3           | Fluidigm        |
| <b>Nd</b> | <b>CD138</b>  | <b>DL-101</b> | <b>Fluidigm</b> |
| Eu        |               |               |                 |
| Sm        | CD103         | B-Ly7         | eBioscience     |
| Eu        |               |               |                 |
| Sm        | CD27          | LG.7F9        | eBioscience     |
| Gd        | CD56          | NCAM16.2      | BD              |
| Gd        | CD3           | UCHT1         | Biolegend       |
| Gd        | CD19          | HIB19         | Biolegend       |
| Gd        | CD45RA        | HI100         | Biolegend       |
| Tb        | CXCR5         | RF8B2         | BD              |
| Gd        | CD28          | CD28.2        | Biolegend       |
| Dy        | CD38          | HIT2          | Biolegend       |
| <b>Dy</b> | <b>CD8</b>    | <b>RPA-T8</b> | <b>Fluidigm</b> |
| Dy        |               |               |                 |
| Dy        |               |               |                 |
| <b>Ho</b> | <b>CD40</b>   | <b>5C3</b>    | <b>Fluidigm</b> |
| Er        |               |               |                 |
| Er        | int b7        | FIB504        | Biolegend       |
| Er        | CCR7          | G043H7        | Biolegend       |
| Tm        | IgD           | IA6-2         | Biolegend       |
| Er        | IgA           | G18-1         | BD              |
| Yb        | HLA-DR        | L243          | Biolegend       |
| <b>Yb</b> | <b>IgM</b>    | <b>MHM-88</b> | <b>Fluidigm</b> |
| Yb        | TCRgd         | 5A6.E9        | in-house        |
| <b>Yb</b> | <b>CD4</b>    | <b>SK3</b>    | <b>Fluidigm</b> |
| Lu        | PD-1          | EH12.2H7      | Fluidigm        |
| Yb        | CD127         | A019D5        | Biolegend       |
| Ir        | DNA1          | -             | Fluidigm        |
| Ir        | DNA2          | -             | Fluidigm        |
| Pt        | cisplatin I/d | -             | Fluidigm        |

1317



1318 **Table S2. CITE-seq antibody details.**

| Target | Antibody                                          | Clone  | Catalog# |
|--------|---------------------------------------------------|--------|----------|
| CD3    | TotalSeq™-A0034 anti-human CD3 Antibody           | UCHT1  | 300475   |
| CD4    | TotalSeq™-A0072 anti-human CD4 Antibody           | RPA-T4 | 300563   |
| CD8a   | TotalSeq™-A0080 anti-human CD8a Antibody          | RPA-T8 | 301067   |
| CD20   | TotalSeq™-A0100 anti-human CD20 Antibody          | 2H7    | 302359   |
| CD27   | TotalSeq™-A0154 anti-human CD27 Antibody          | O323   | 302847   |
| CD38   | TotalSeq™-A0389 anti-human CD38 Antibody          | HIT2   | 303541   |
| CD10   | TotalSeq™-A0062 anti-human CD10 Antibody          | HI10a  | 312231   |
| CXCR4  | TotalSeq™-A0366 anti-human CD184 (CXCR4) Antibody | 12G5   | 306531   |
| CXCR5  | TotalSeq™-A0144 anti-human CD185 (CXCR5) Antibody | J252D4 | 356937   |
| CD44   | TotalSeq™-A0125 anti-human CD44 Antibody          | BJ18   | 338825   |
| IgD    | TotalSeq™-A0384 anti-human IgD Antibody           | IA6-2  | 348243   |
| IgM    | TotalSeq™-A0136 anti-human IgM Antibody           | MHM-88 | 314541   |

1319
